# Supplementary material for: Method for the synthesis of N-alkyl-O-alkyl carbamates
Source: Royal Society of Chemistry journal article supplement (doi:10.1039/c4ra00373j), 2014-01-01

**Method for the synthesis of *N*-alkyl, *O*-alkyl carbamates.**

Victoria A. Vaillard, Marianela González, Jesica P. Perotti, Ricardo J. A. Grau and

Santiago E. Vaillard\*

Instituto de Desarrollo Tecnológica para la Industria Química (INTEC) Centro Científico  
Tecnológica Santa Fe. CONICET-UNL. Ruta Nacional 168 Km 1. Paraje el Pozo. 3000.

Santa Fe. Argentina

**Supporting Information**

<sup>1</sup>H and <sup>13</sup>C spectra for compounds **2a-d**, **3a-d** and **4a-t**

**1**

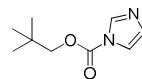

<sup>1</sup>H NMR Neopentyl *1H*-imidazole-1-carboxylate (CDCl<sub>3</sub>) **2a**

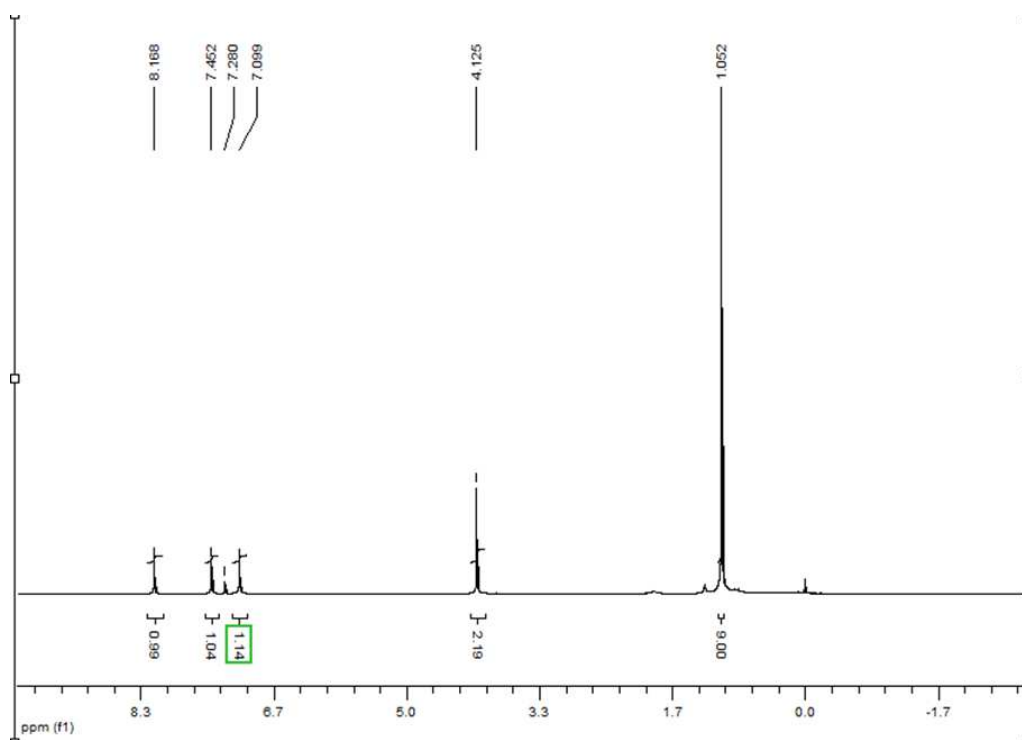

<sup>13</sup>C NMR Neopentyl *1H*-imidazole-1-carboxylate (CDCl<sub>3</sub>) **2a**

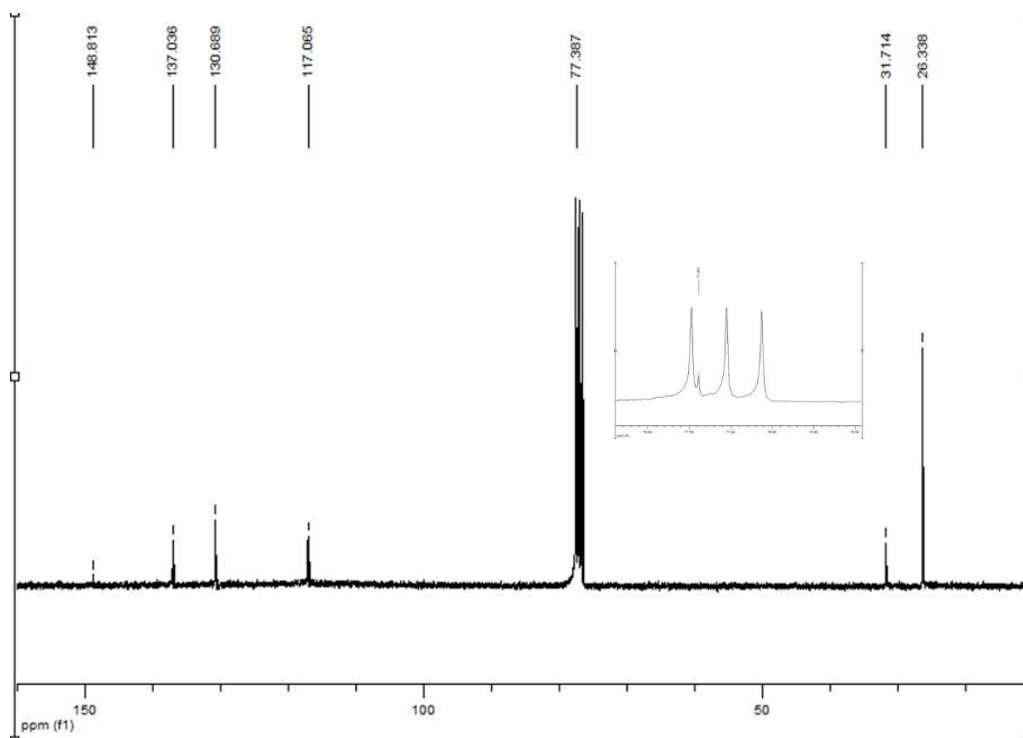

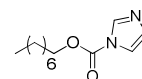

$^1\text{H}$  NMR octyl pyrrolidine-1-carboxylate ( $\text{CDCl}_3$ ) **2b**

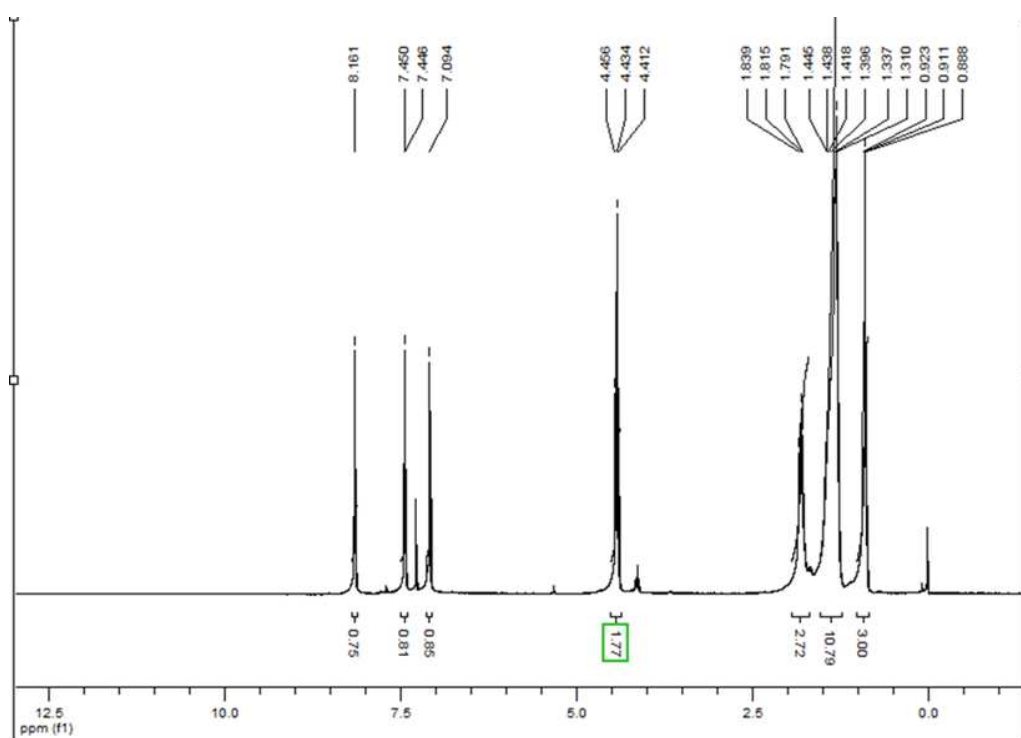

$^{13}\text{C}$  NMR octyl pyrrolidine-1-carboxylate ( $\text{CDCl}_3$ ) **2b**

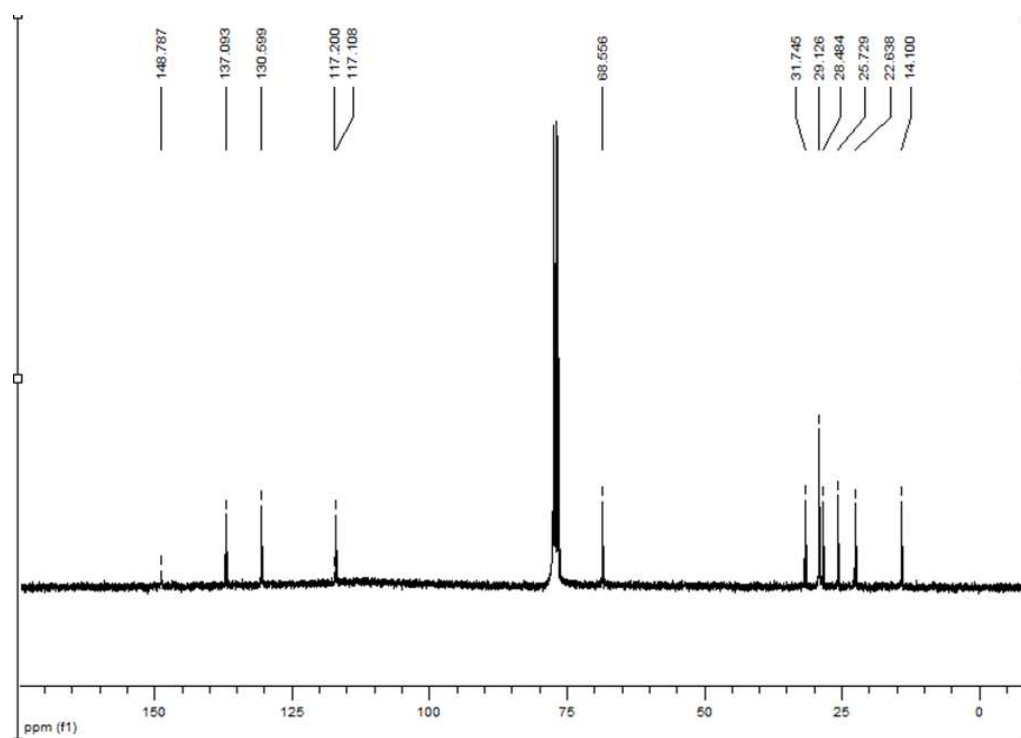

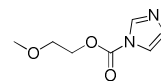

$^1\text{H}$  NMR 2-methoxyethyl 1H-imidazole-1-carboxylate ( $\text{CDCl}_3$ ) **2c**

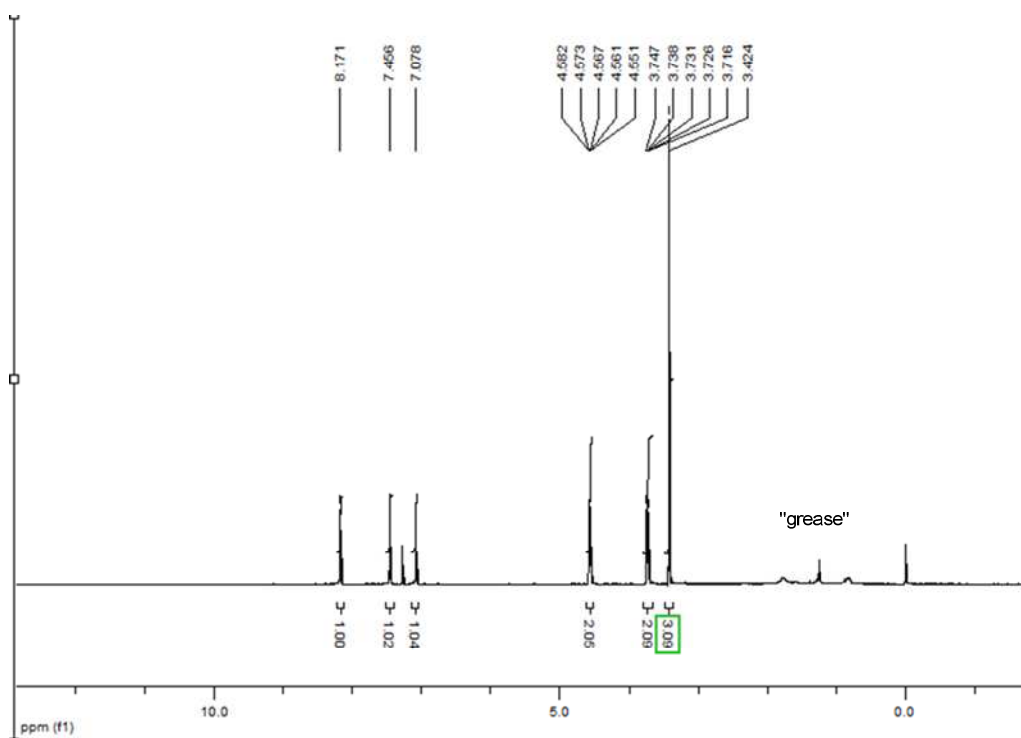

$^{13}\text{C}$  NMR 2-methoxyethyl 1H-imidazole-1-carboxylate ( $\text{CDCl}_3$ ) **2c**

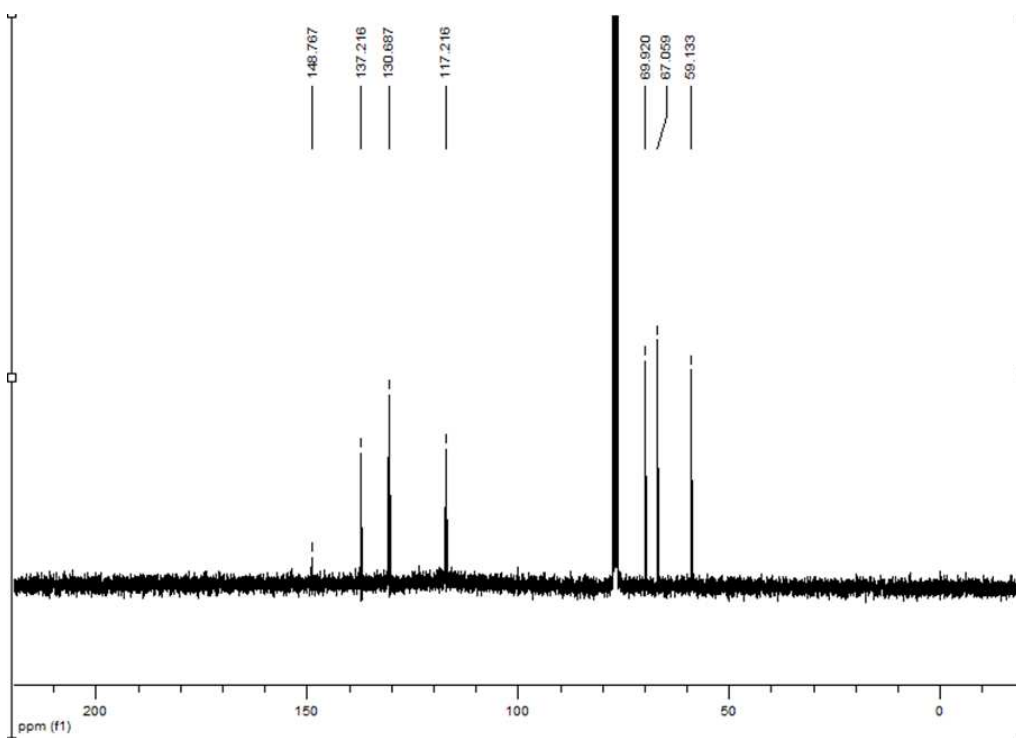

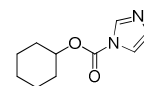

$^1\text{H}$  NMR Cyclohexyl 1*H*-imidazole-1-carboxylate ( $\text{CDCl}_3$ ) **2d**

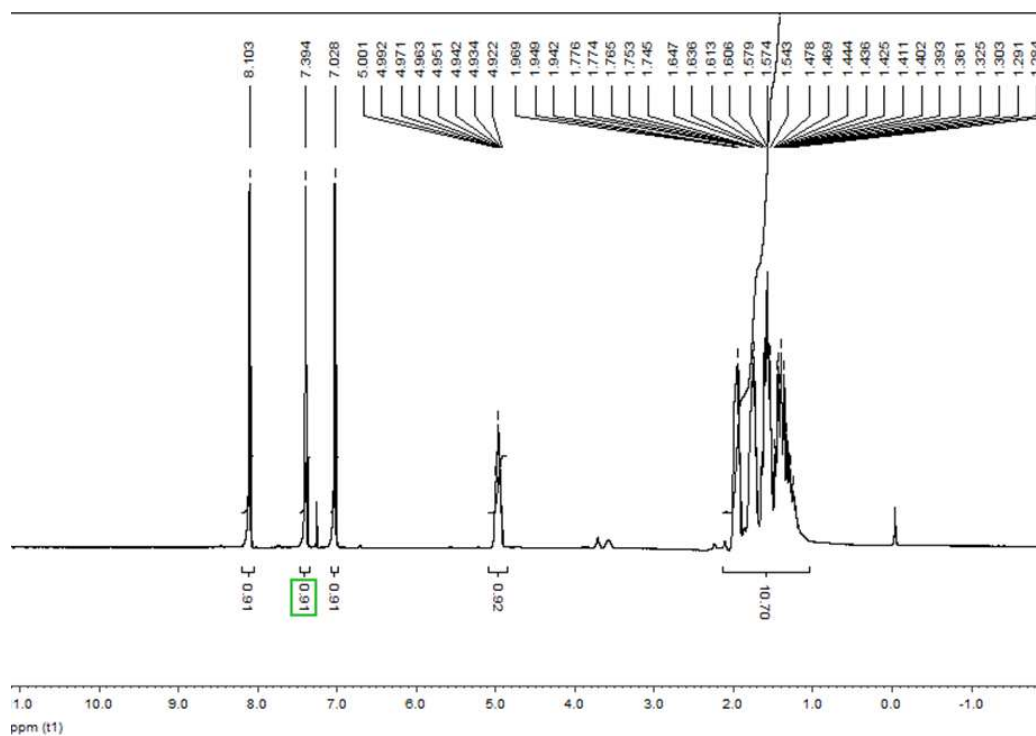

$^{13}\text{C}$  NMR Cyclohexyl 1*H*-imidazole-1-carboxylate ( $\text{CDCl}_3$ ) **2d**

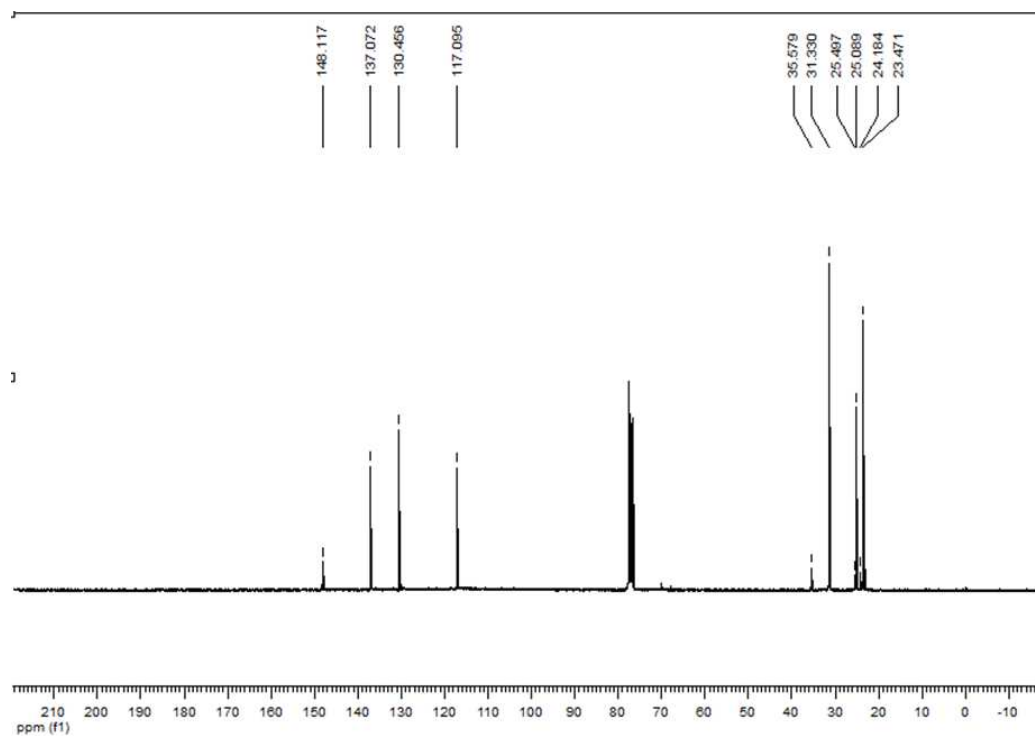

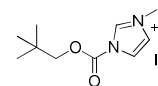

$^1\text{H}$  NMR 3-methyl-1-((neopentyloxy)carbonyl)-1H-imidazol-3-ium iodide ( $\text{CDCl}_3$ ) **3a**

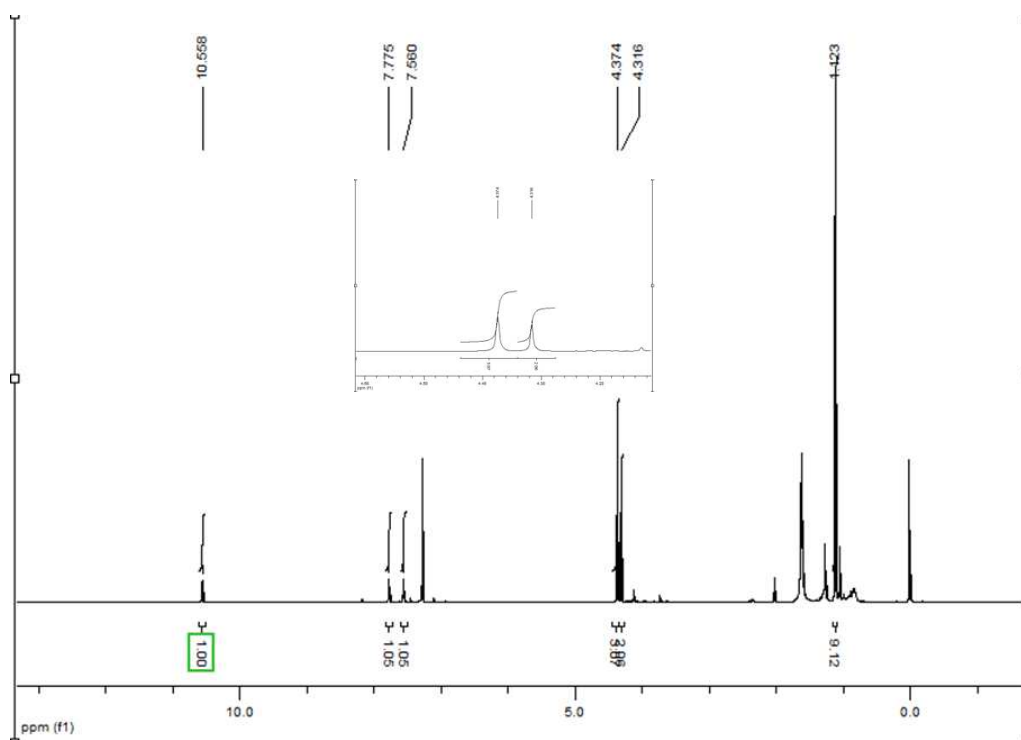

$^{13}\text{C}$  NMR 3-methyl-1-((neopentyloxy)carbonyl)-1H-imidazol-3-ium iodide ( $\text{DMSO-}d_6$ ) **3a**

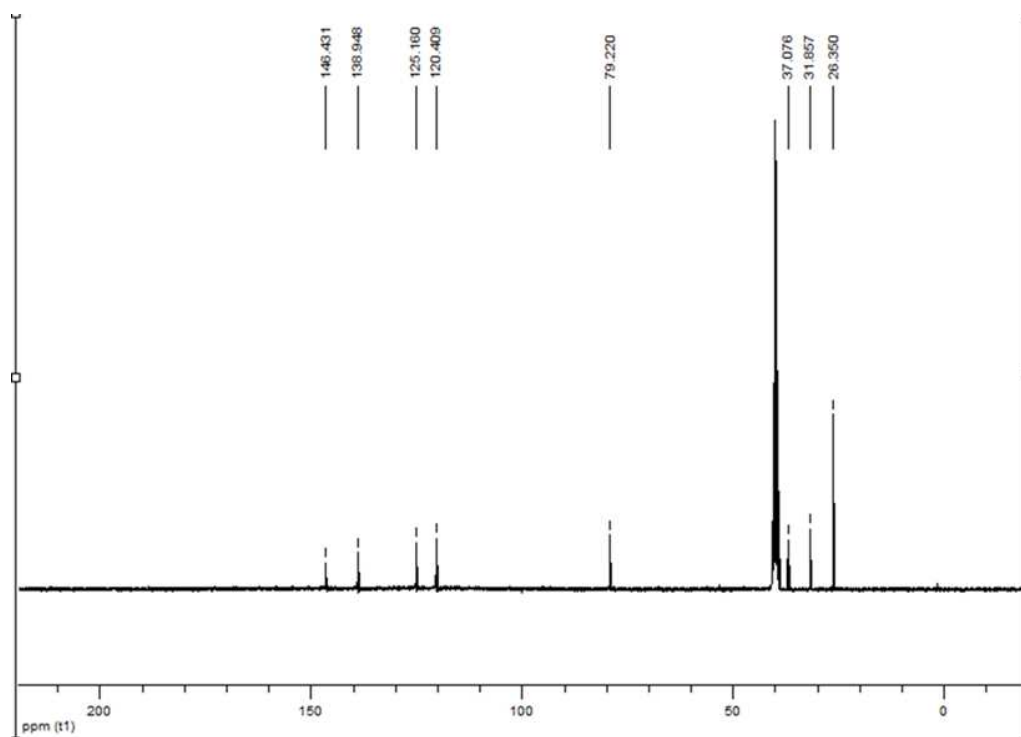

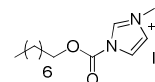

$^1\text{H}$  NMR 3-methyl-1-((octyloxy)carbonyl)-1H-imidazol-3-ium iodide ( $\text{CDCl}_3$ ) **3b**

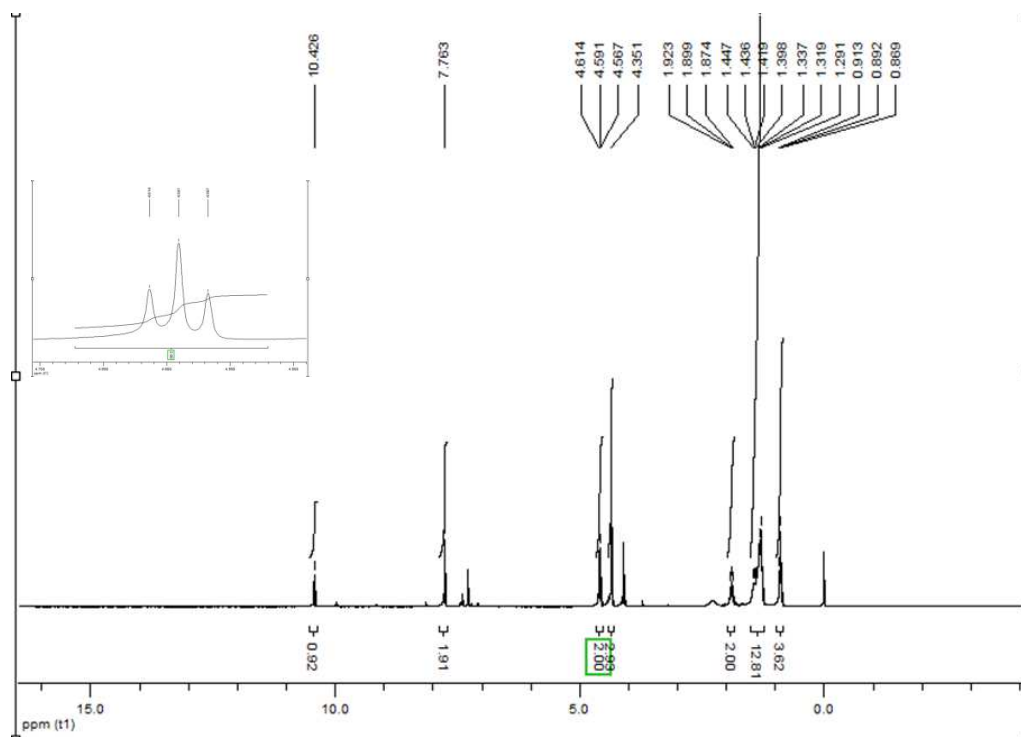

$^{13}\text{C}$  NMR 3-methyl-1-((octyloxy)carbonyl)-1H-imidazol-3-ium iodide ( $\text{CDCl}_3$ ) **3b**

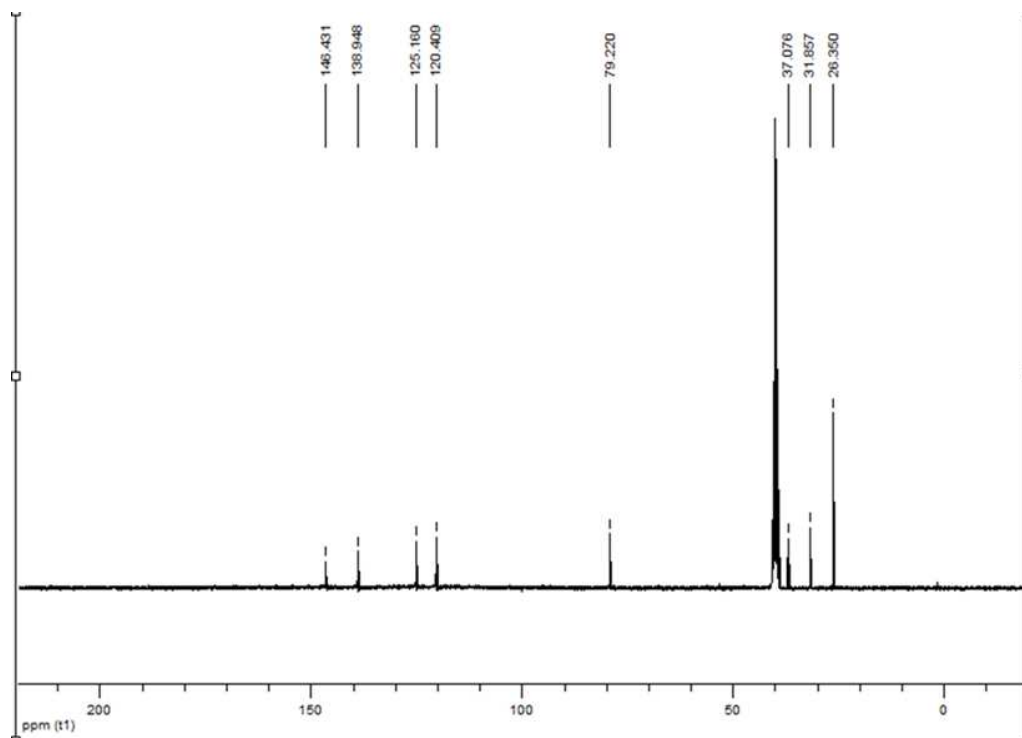

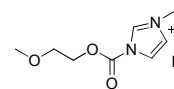

$^1\text{H}$  NMR 3-methyl-1-(2-methoxyethoxy)carbonyl-1*H*-imidazol-3-ium iodide ( $\text{CDCl}_3$ ) **3c**

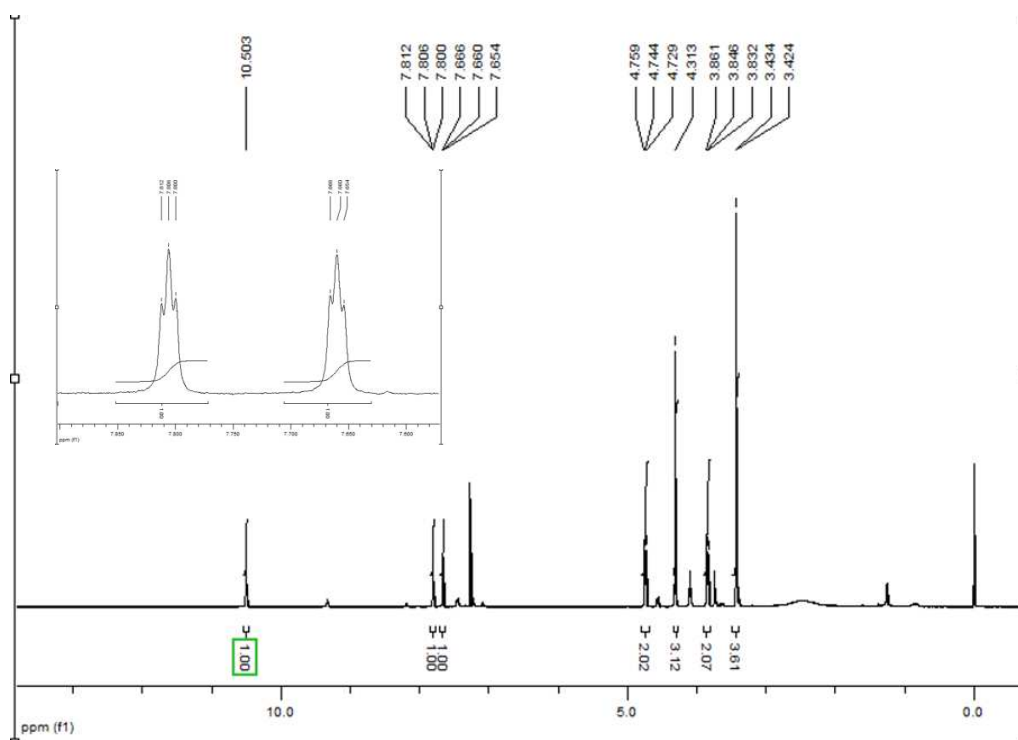

$^{13}\text{C}$  NMR 3-methyl-1-(2-methoxyethoxy)carbonyl-1*H*-imidazol-3-ium iodide ( $\text{CDCl}_3$ ) **3c**

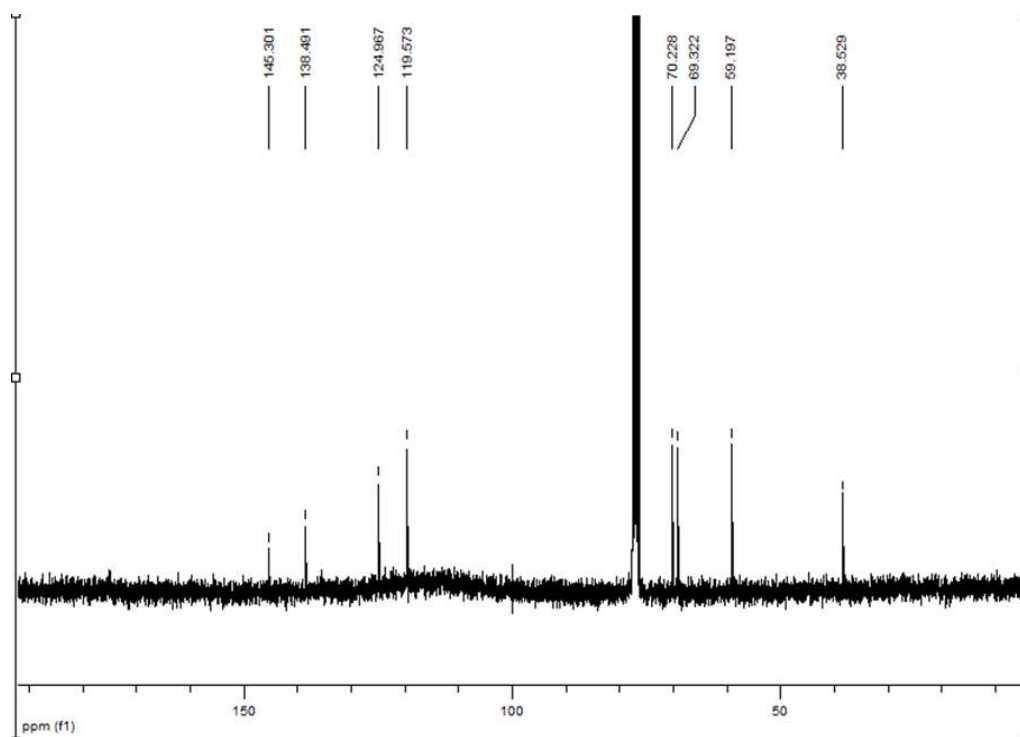



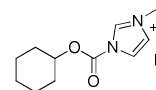

$^1\text{H}$  NMR 1-((cyclohexyloxy)carbonyl)-3-methyl-1*H*-imidazol-3-ium iodide ( $\text{CDCl}_3$ ) **3d**

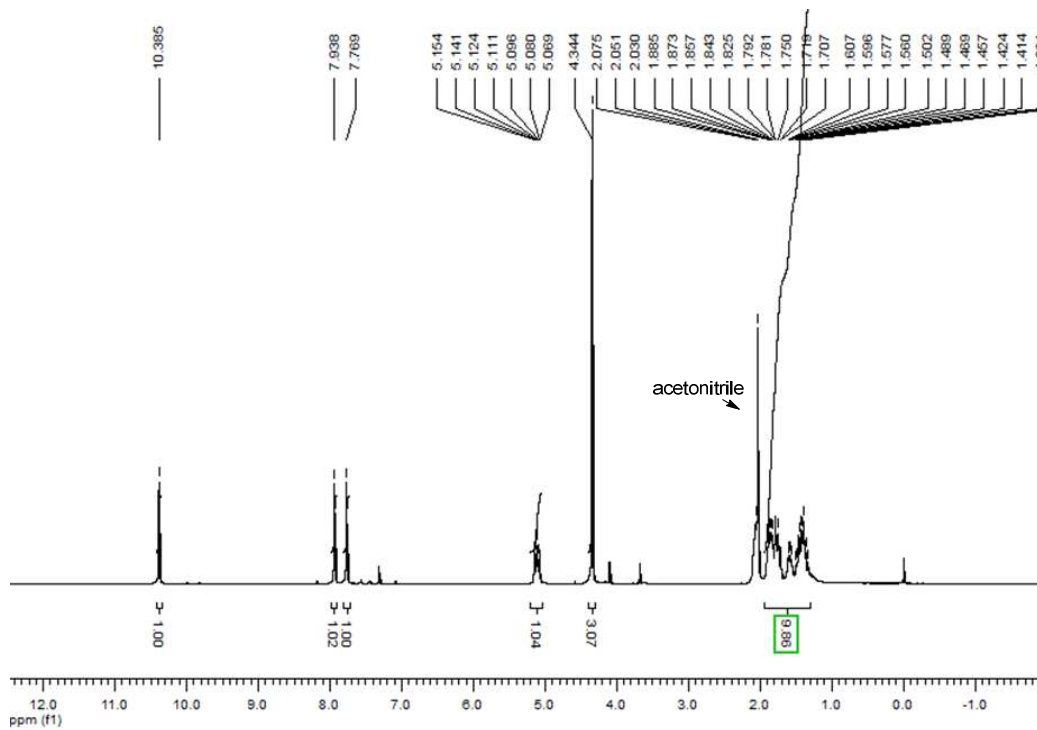

$^{13}\text{C}$  NMR 1-((cyclohexyloxy)carbonyl)-3-methyl-1*H*-imidazol-3-ium iodide ( $\text{CDCl}_3$ ) **3d**

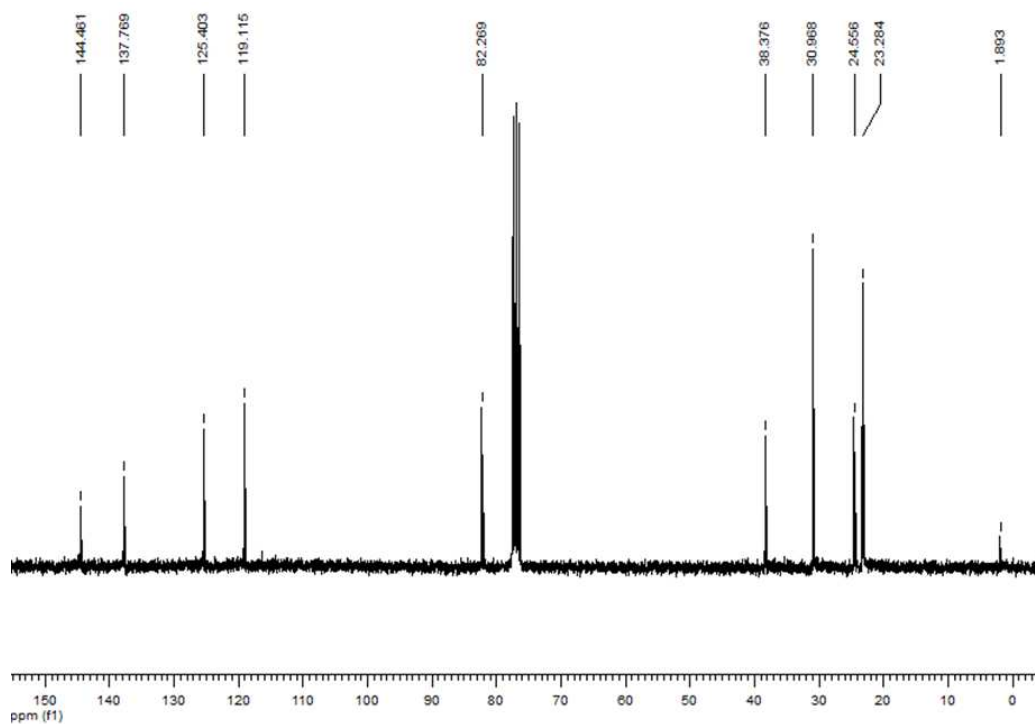

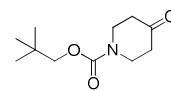

$^1\text{H}$  NMR neopentyl 4-oxopiperidine-1-carboxylate ( $\text{CDCl}_3$ ) **4a**

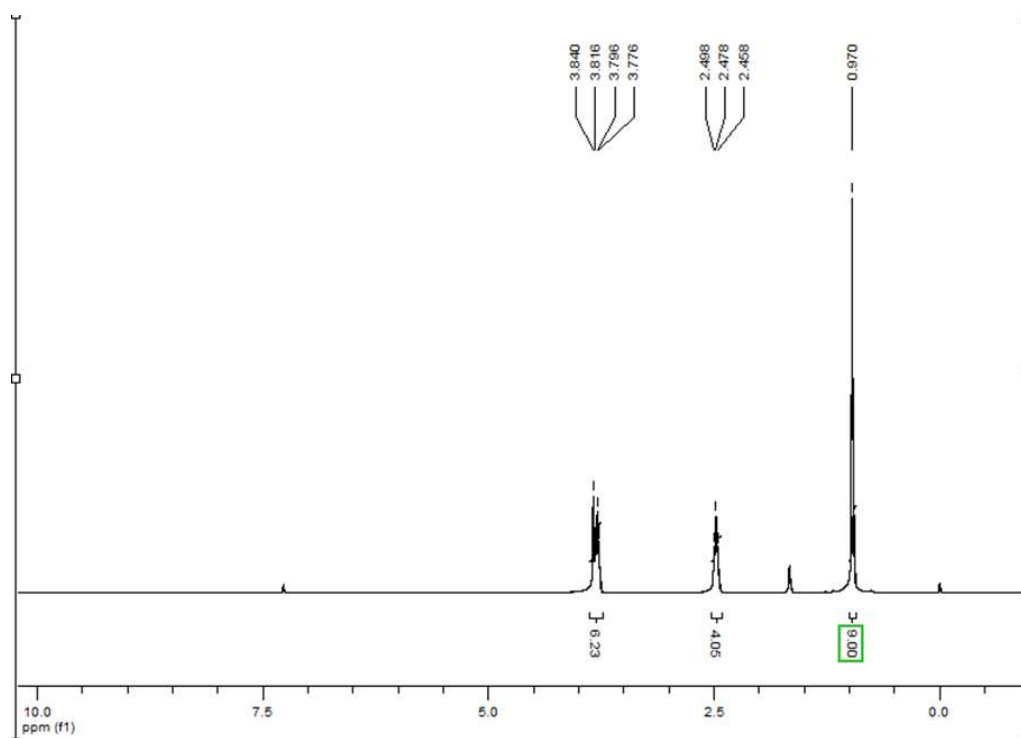

$^{13}\text{C}$  NMR neopentyl 4-oxopiperidine-1-carboxylate ( $\text{CDCl}_3$ ) **4a**

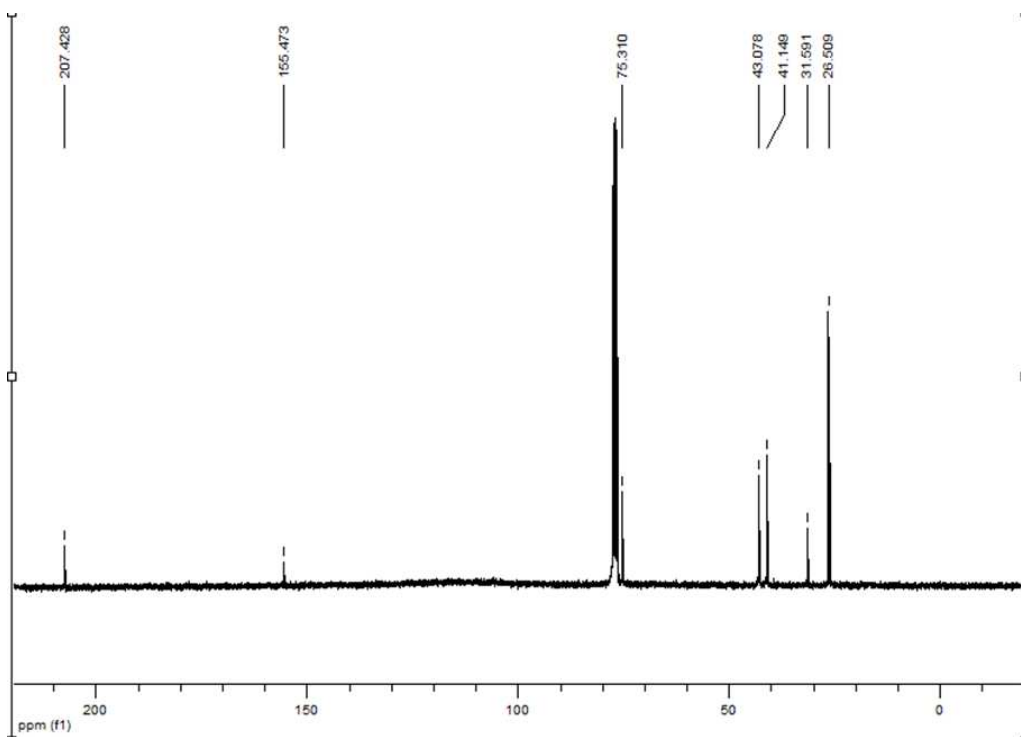

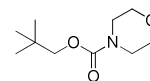

$^1\text{H}$  NMR neopentyl morpholine-4-carboxylate ( $\text{CDCl}_3$ ) **4b**

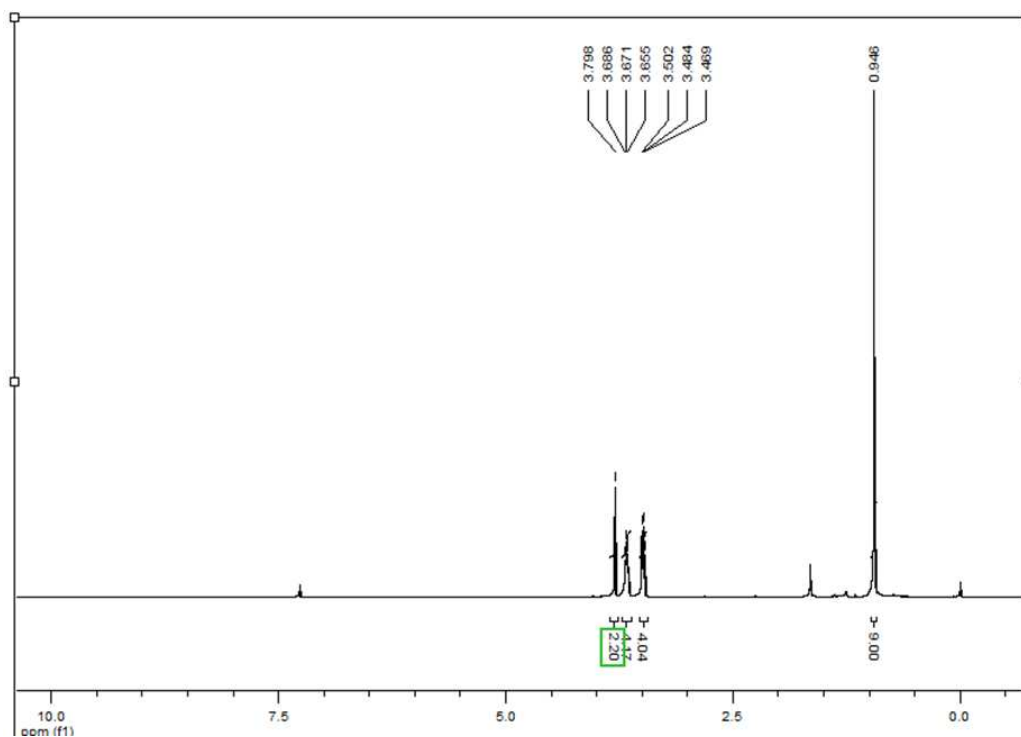

$^{13}\text{C}$  NMR neopentyl morpholine-4-carboxylate ( $\text{CDCl}_3$ ) **4b**

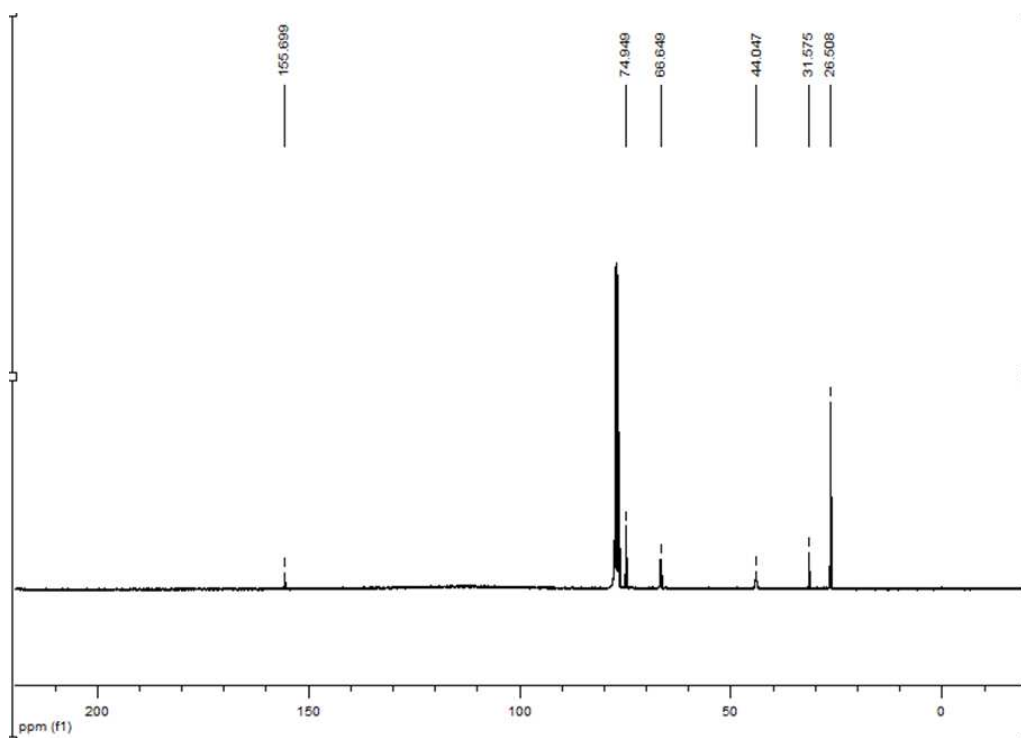

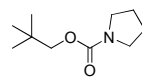

$^1\text{H}$  NMR neopentyl pyrrolidine-1-carboxylate ( $\text{CDCl}_3$ ) **4c**

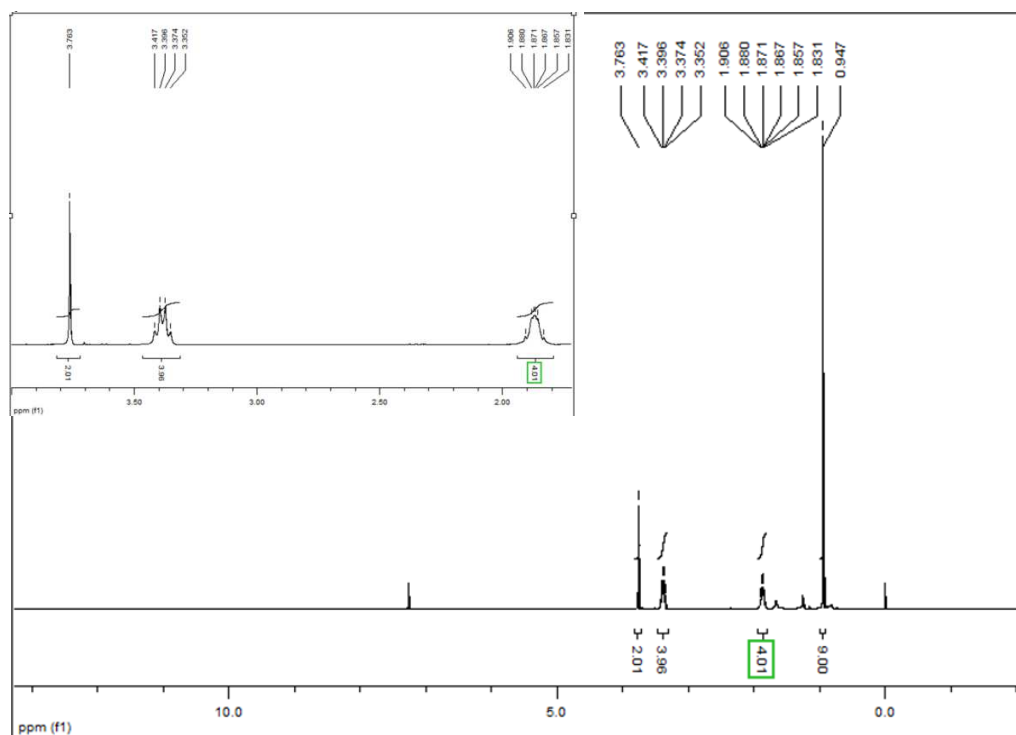

$^{13}\text{C}$  NMR neopentyl pyrrolidine-1-carboxylate ( $\text{CDCl}_3$ ) **4c**

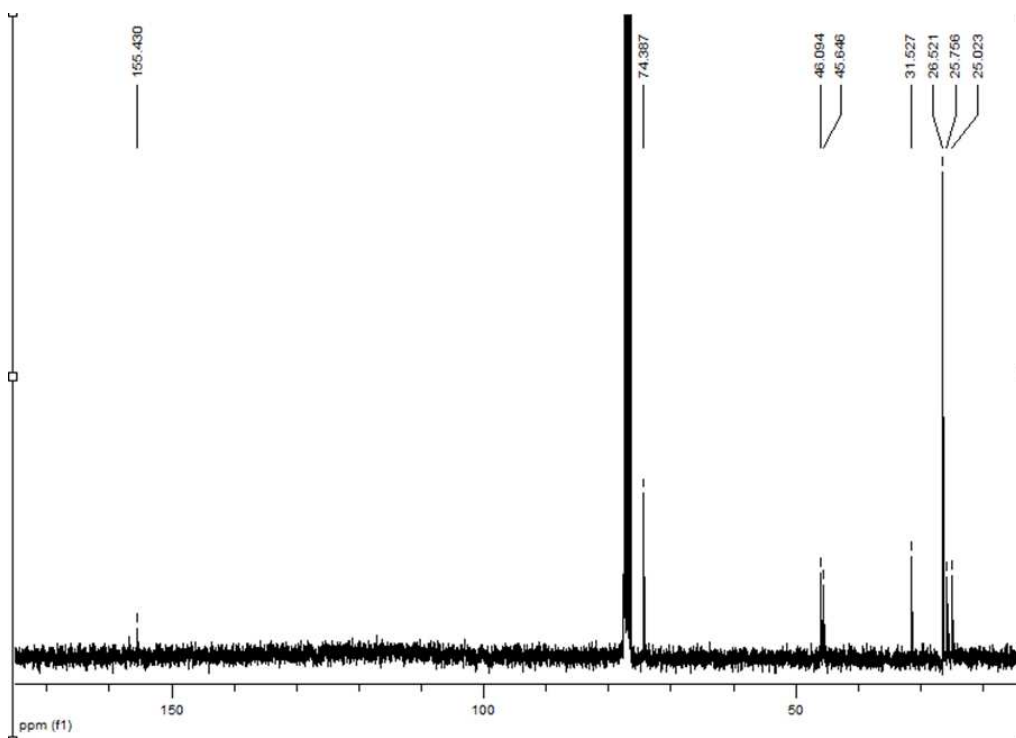

$^1\text{H}$

12

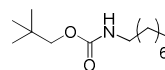

NMR neopentyl octylcarbamate (CDCl<sub>3</sub>) **4d**

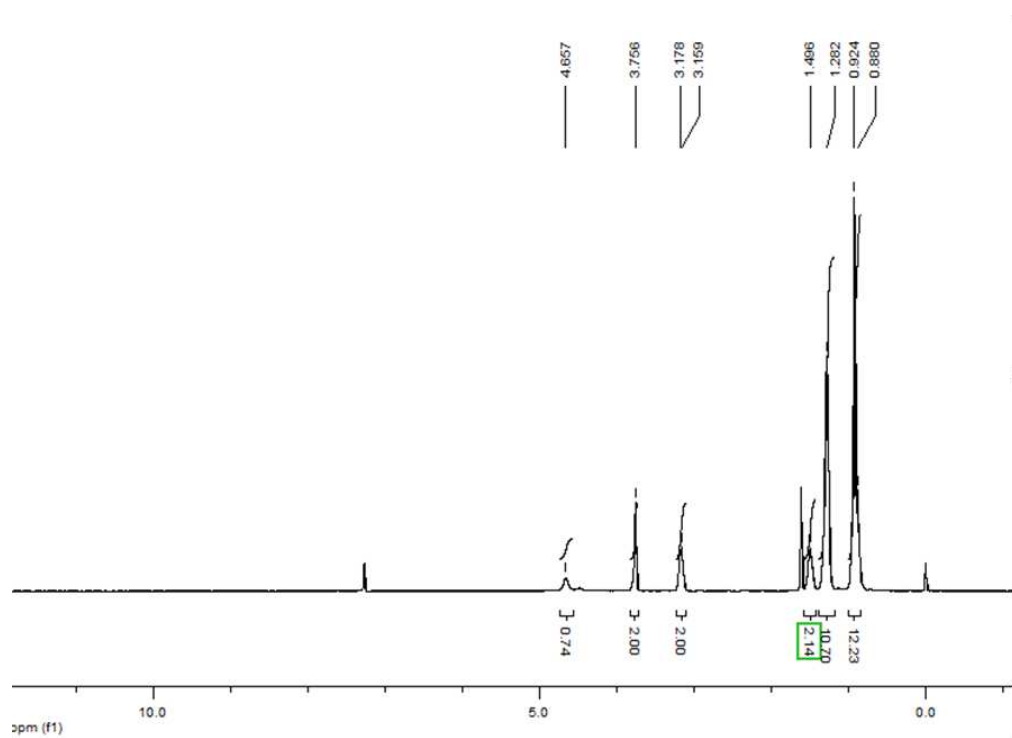

<sup>13</sup>C NMR neopentyl octylcarbamate (CDCl<sub>3</sub>) **4d**

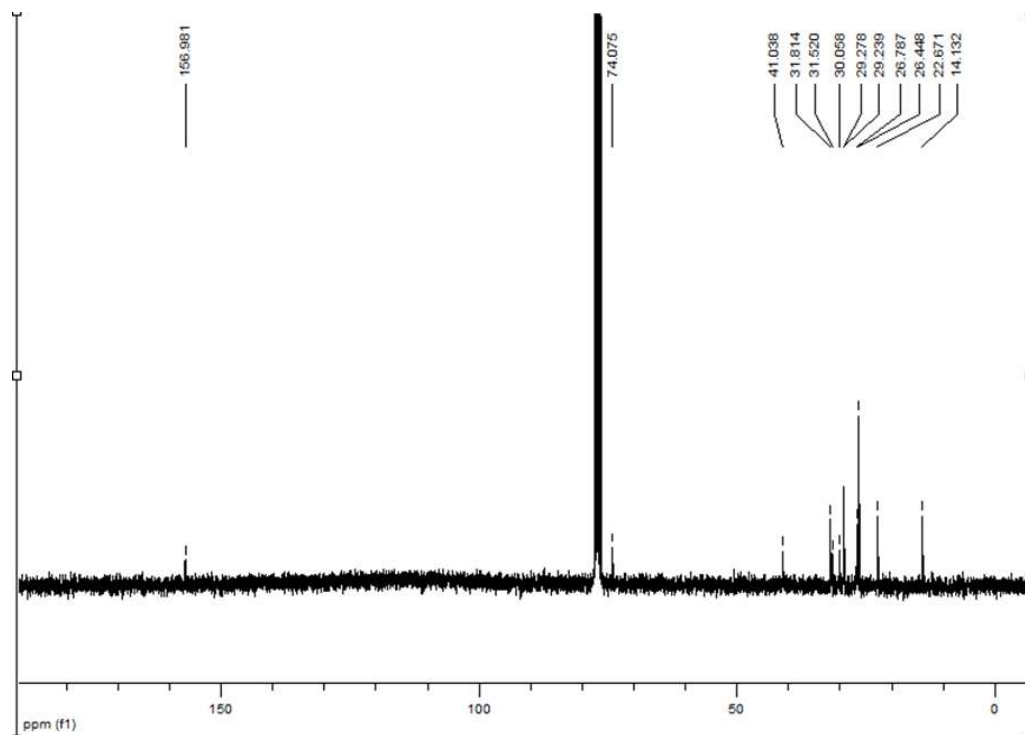

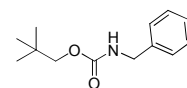

$^1\text{H}$  NMR neopentyl benzylcarbamate ( $\text{CDCl}_3$ ) **4e**

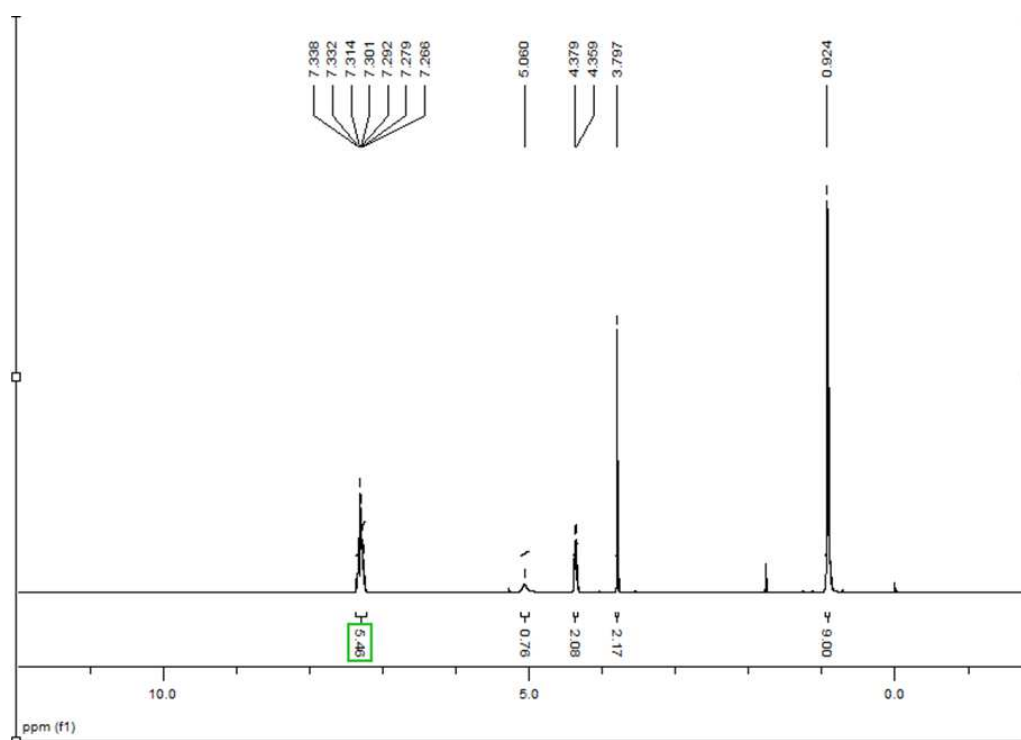

$^{13}\text{C}$  NMR neopentyl benzylcarbamate ( $\text{CDCl}_3$ ) **4d**

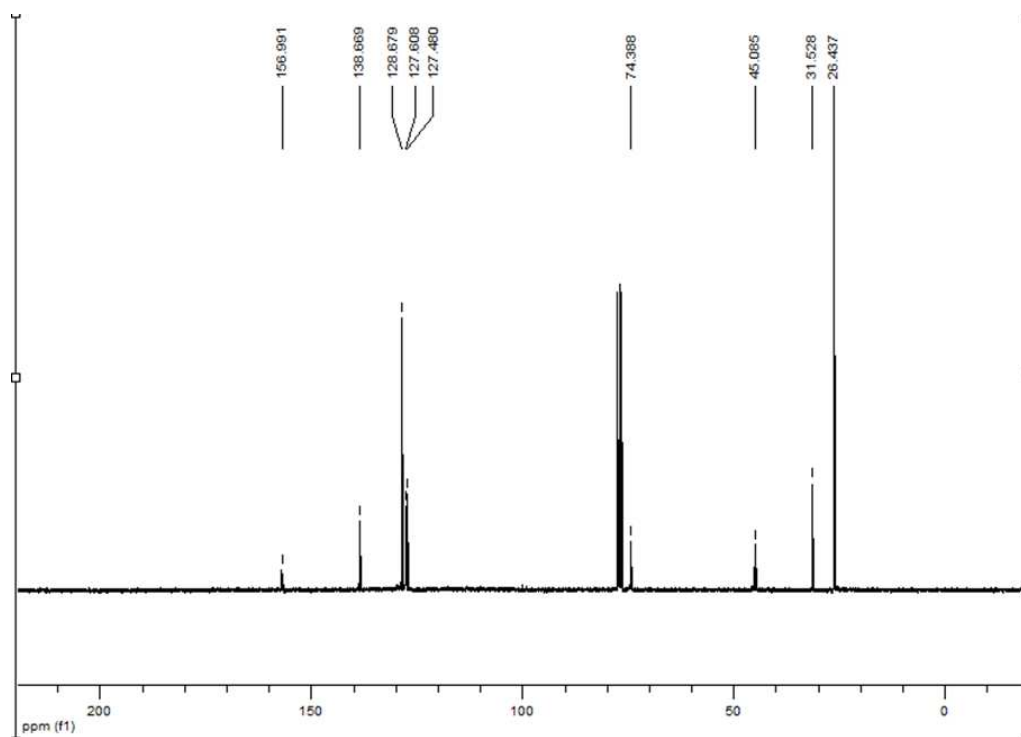

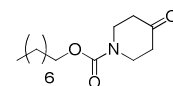

$^1\text{H}$  NMR octyl 4-oxopiperidine-1-carboxylate ( $\text{CDCl}_3$ ) **4f**

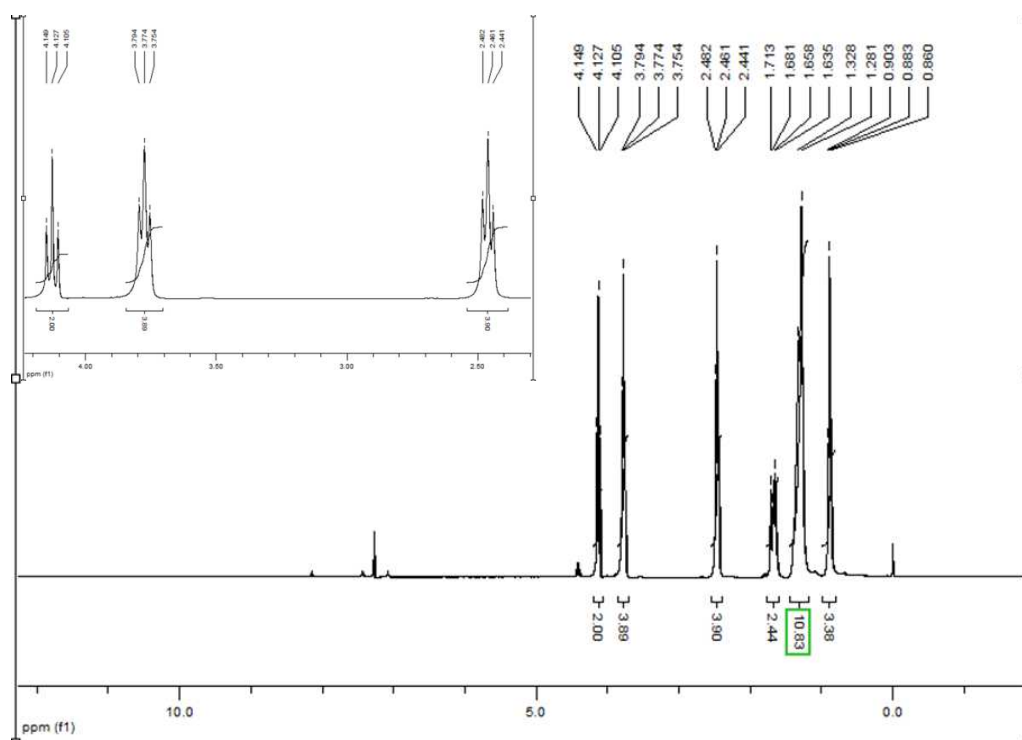

$^{13}\text{C}$  NMR octyl 4-oxopiperidine-1-carboxylate ( $\text{CDCl}_3$ ) **4f**

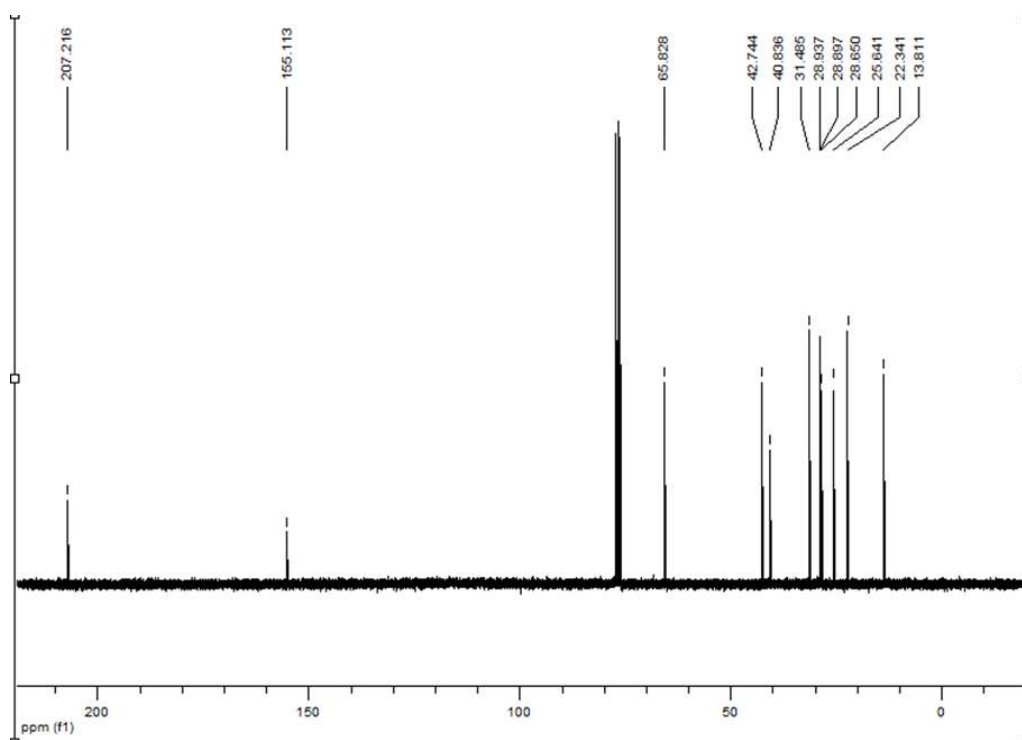

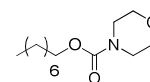

$^1\text{H}$  octyl morpholine-4-carboxylate ( $\text{CDCl}_3$ ) **4g**

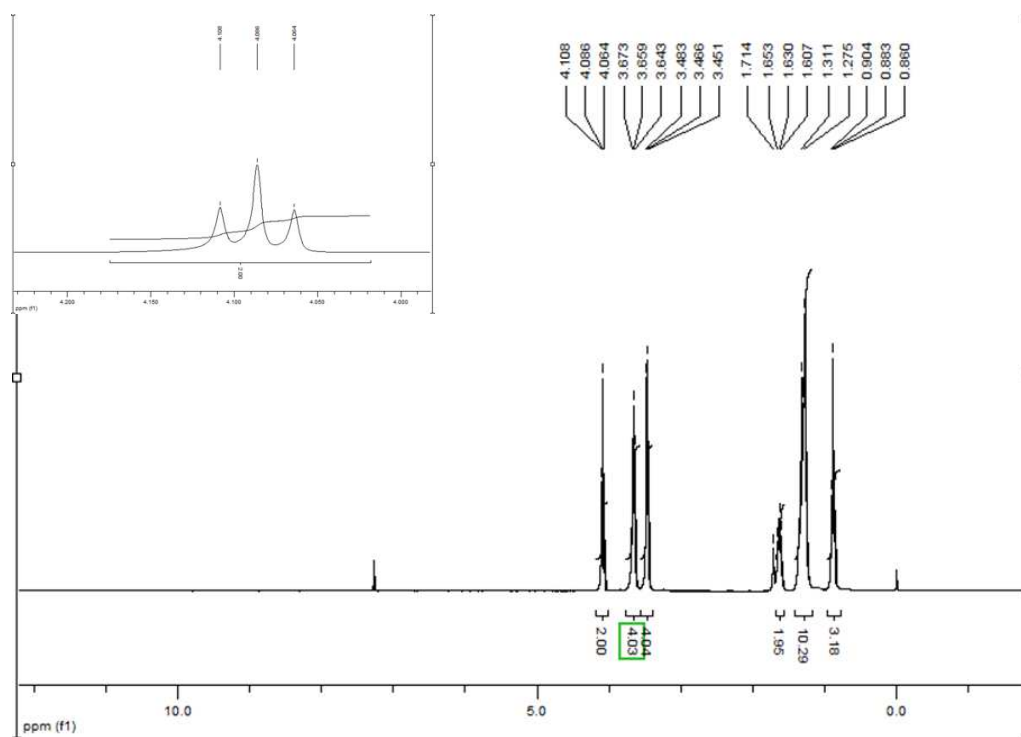

$^{13}\text{C}$  octyl morpholine-4-carboxylate ( $\text{CDCl}_3$ ) **4g**

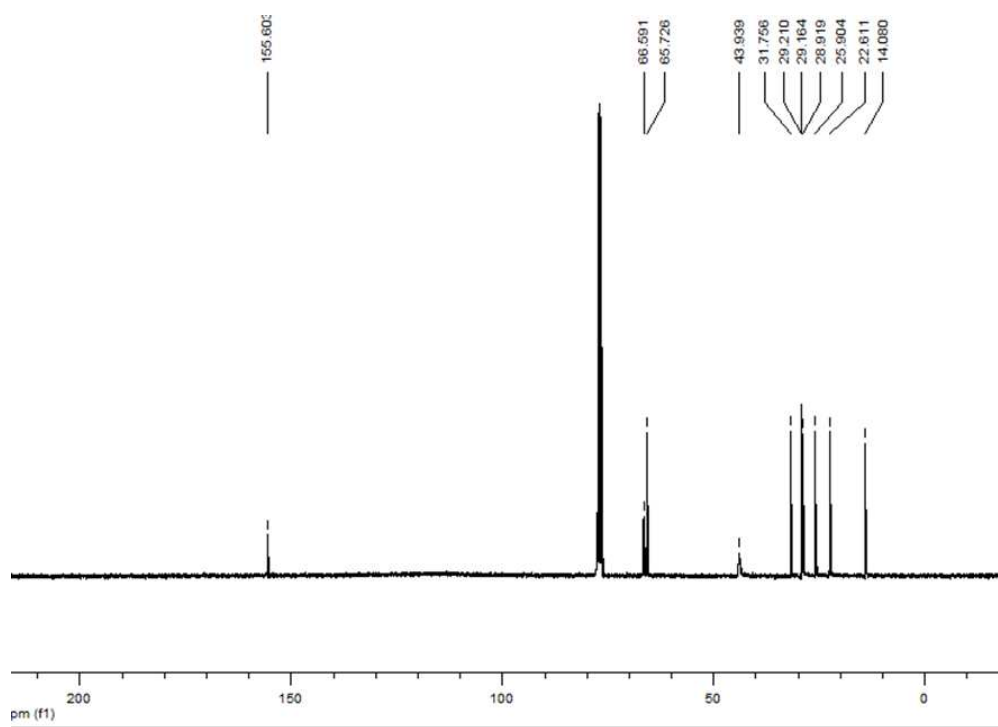



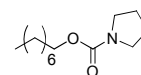

$^1\text{H}$  NMR octyl pyrrolidine-1-carboxylate ( $\text{CDCl}_3$ ) **4h**

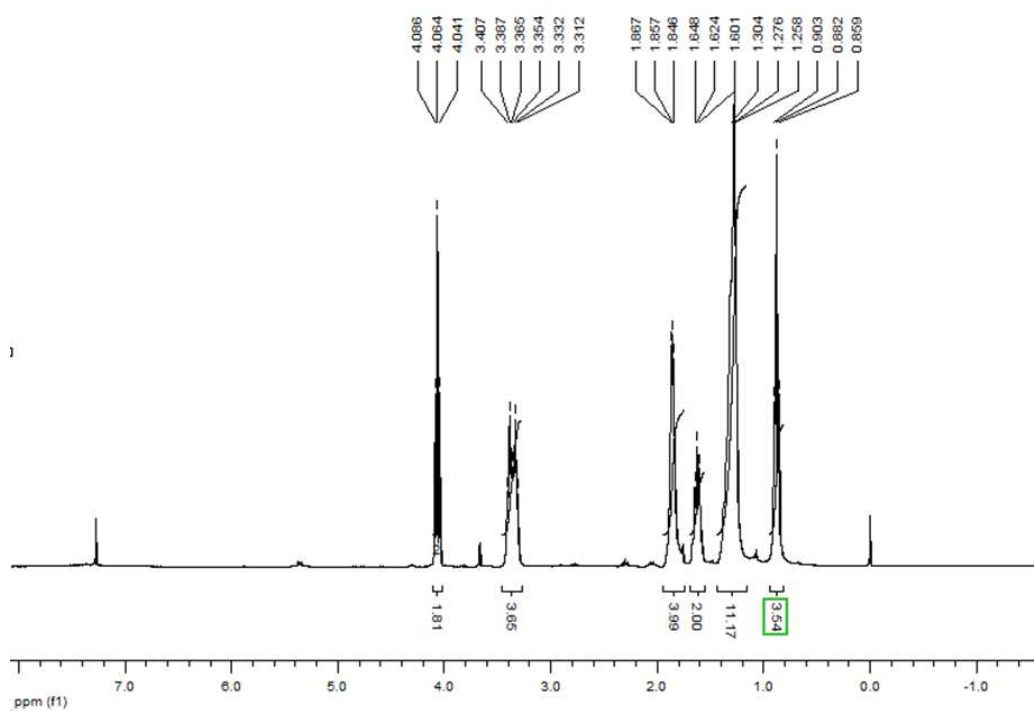

$^{13}\text{C}$  NMR octyl pyrrolidine-1-carboxylate ( $\text{CDCl}_3$ ) **4h**

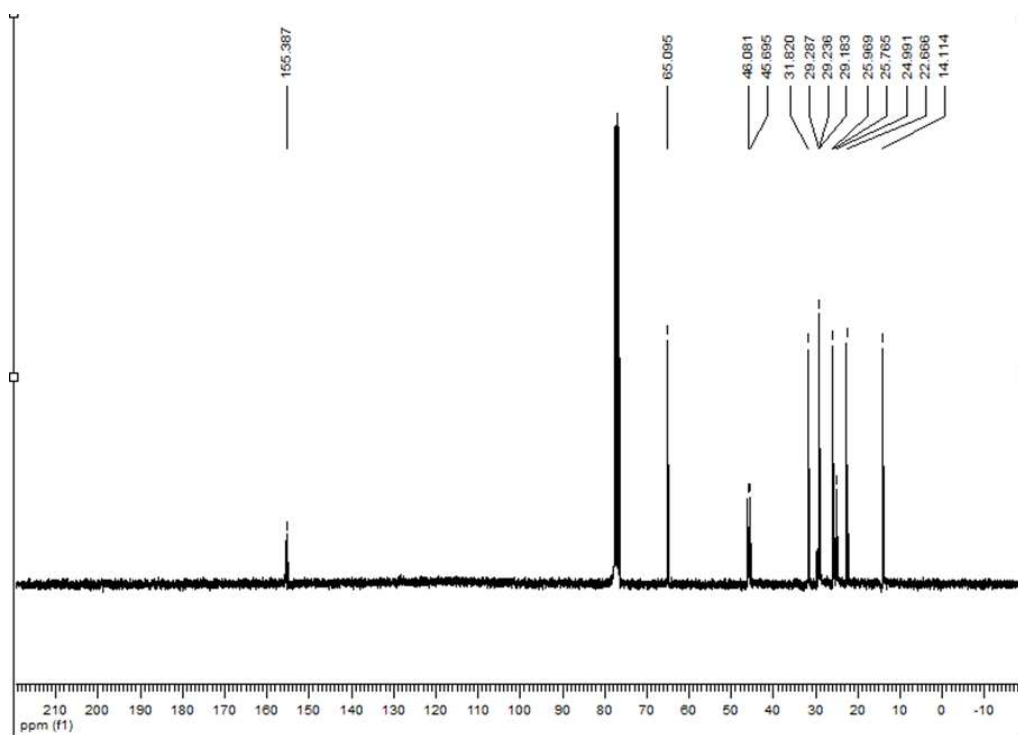

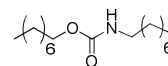

$^1\text{H}$  NMR octyl octylcarbamate ( $\text{CDCl}_3$ ) **4i**

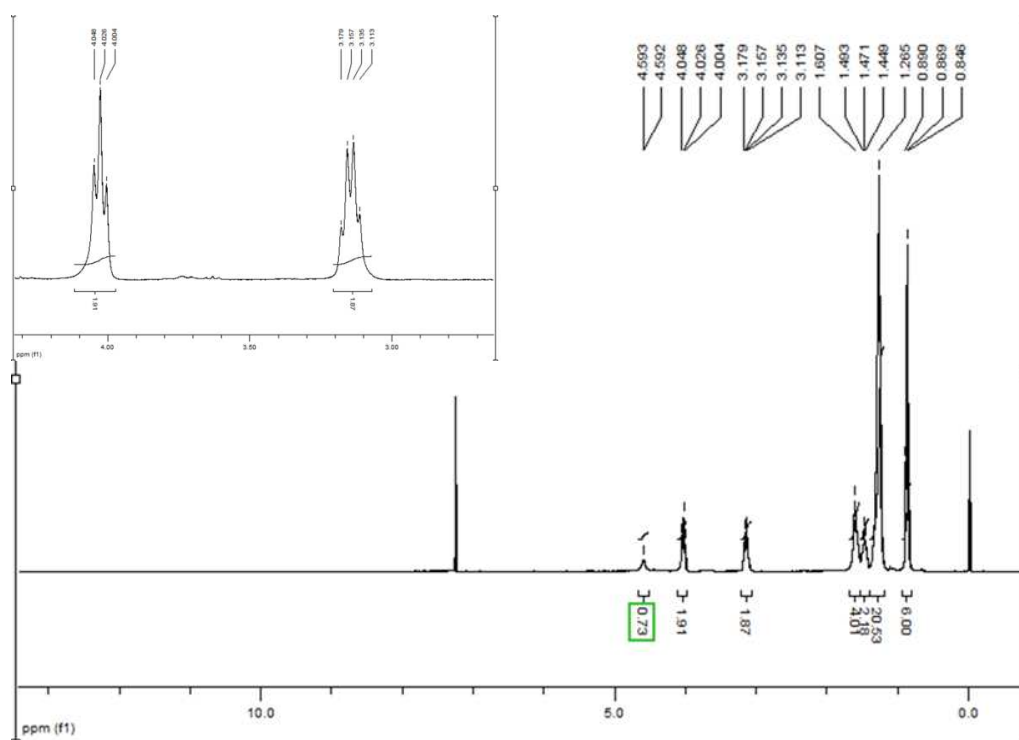

$^{13}\text{C}$  NMR octyl octylcarbamate ( $\text{CDCl}_3$ ) **4i**

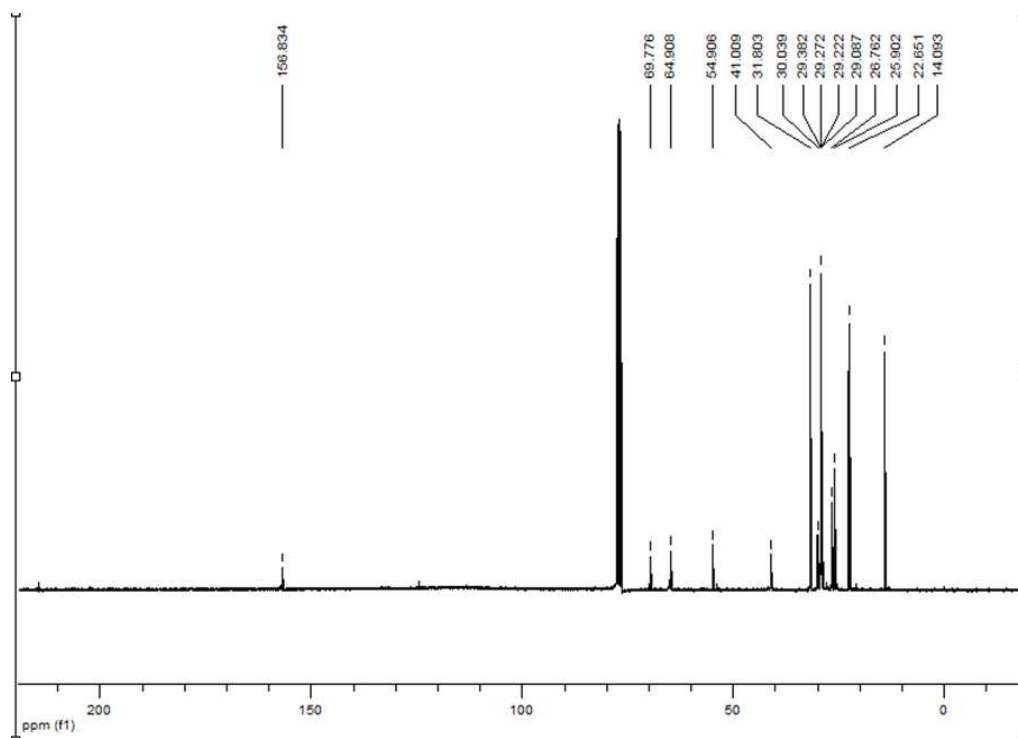

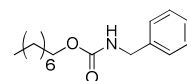

$^1\text{H}$  NMR octyl benzylcarbamate ( $\text{CDCl}_3$ ) **4j**

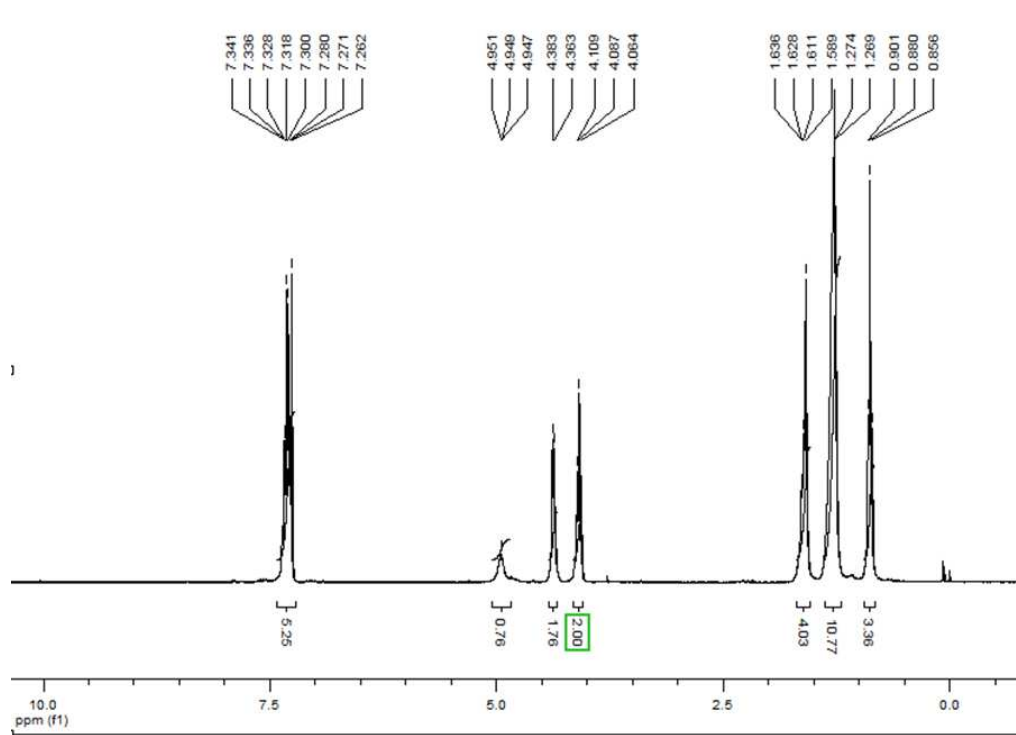

$^{13}\text{C}$  NMR octyl benzylcarbamate ( $\text{CDCl}_3$ ) **4j**

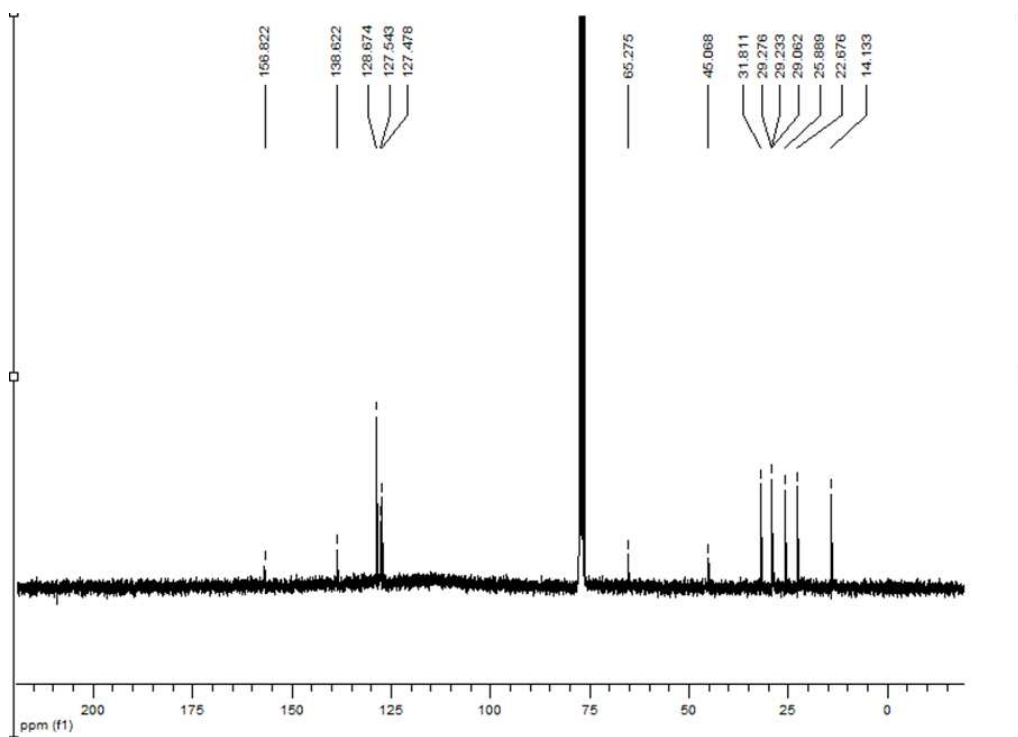

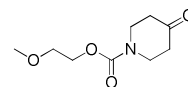

$^1\text{H}$  NMR 2-methoxyethyl 4-oxopiperidine-1-carboxylate ( $\text{CDCl}_3$ ) **4k**

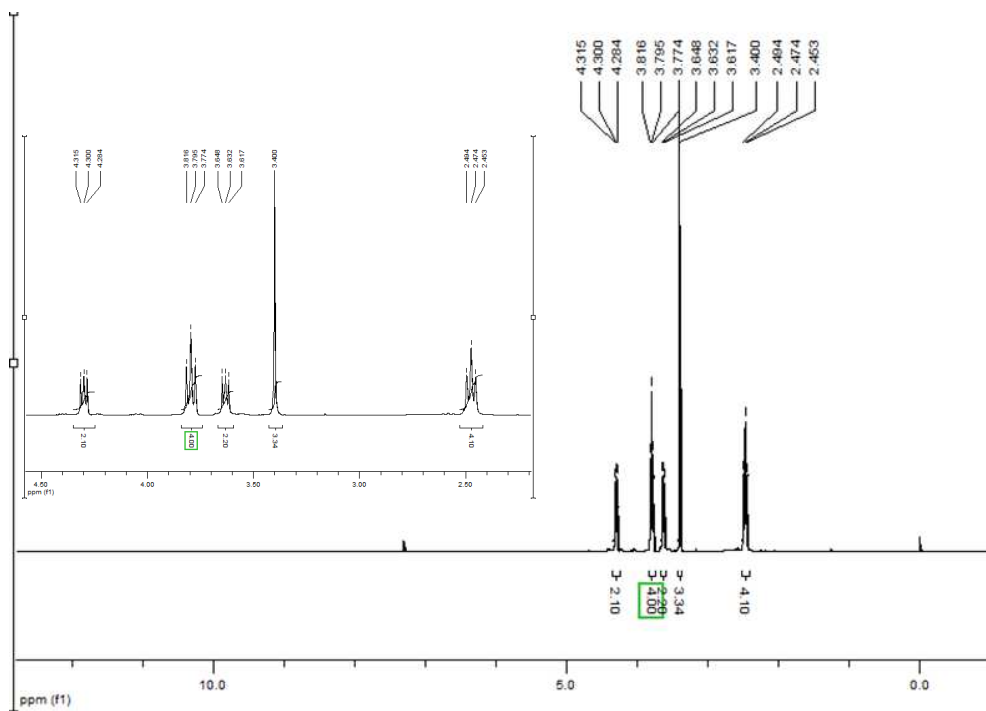

$^{13}\text{C}$  NMR 2-methoxyethyl 4-oxopiperidine-1-carboxylate ( $\text{CDCl}_3$ ) **4k**

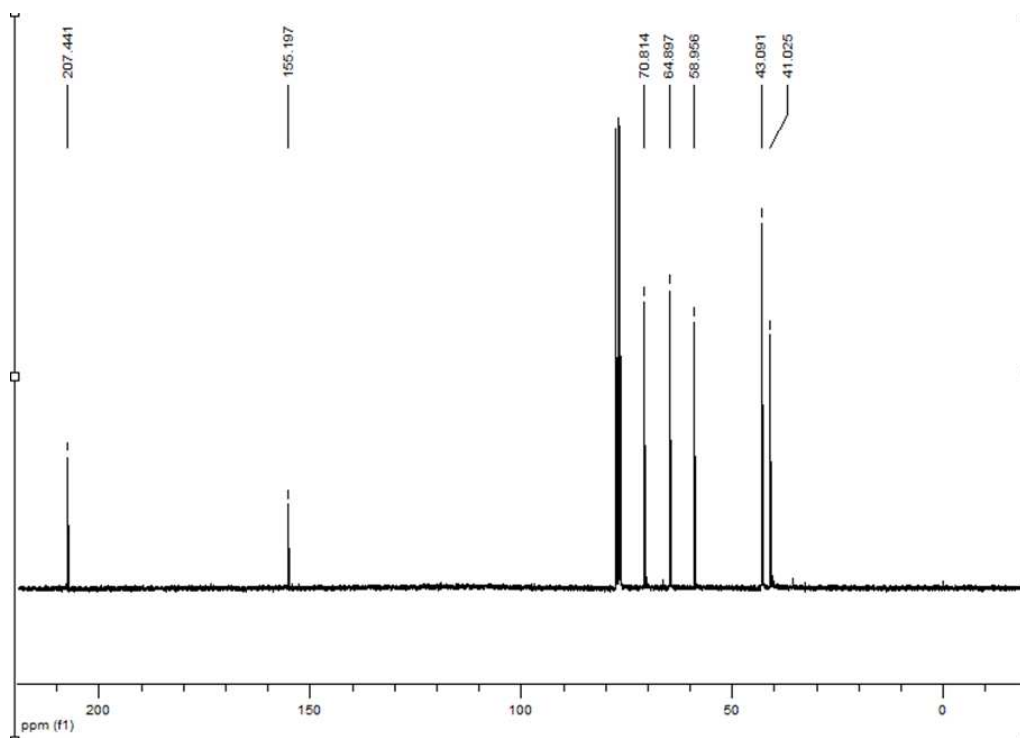

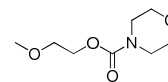

<sup>1</sup>H NMR 2-methoxyethyl morpholine-4-carboxylate (CDCl<sub>3</sub>) **4I**

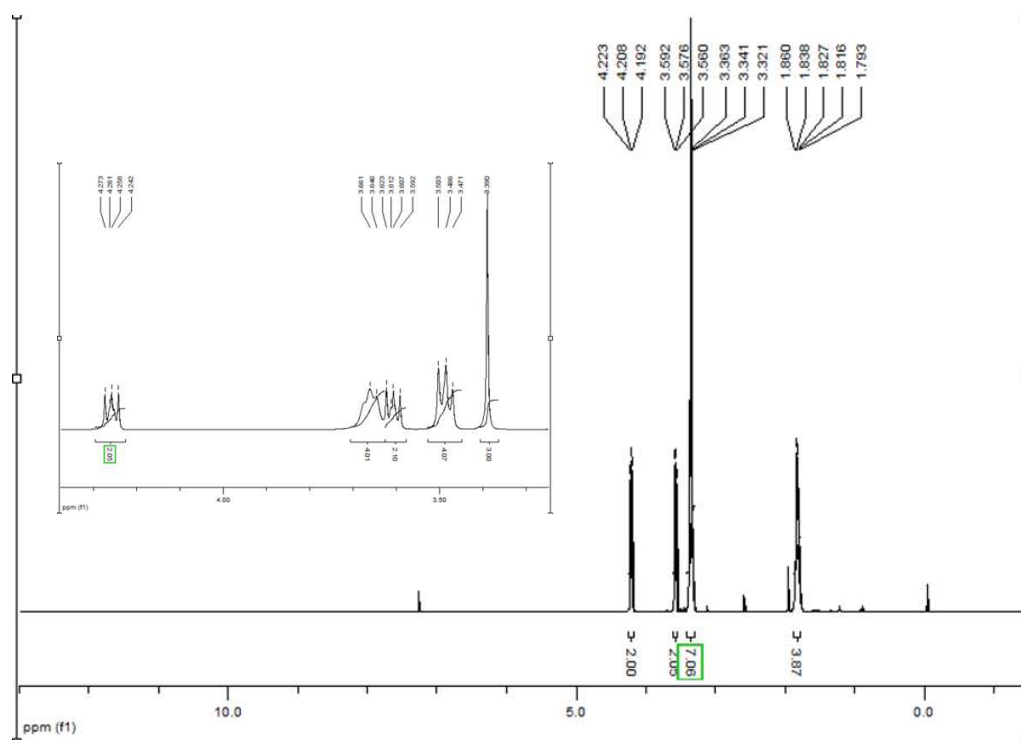

<sup>13</sup>C NMR 2-methoxyethyl morpholine-4-carboxylate (CDCl<sub>3</sub>) **4I**

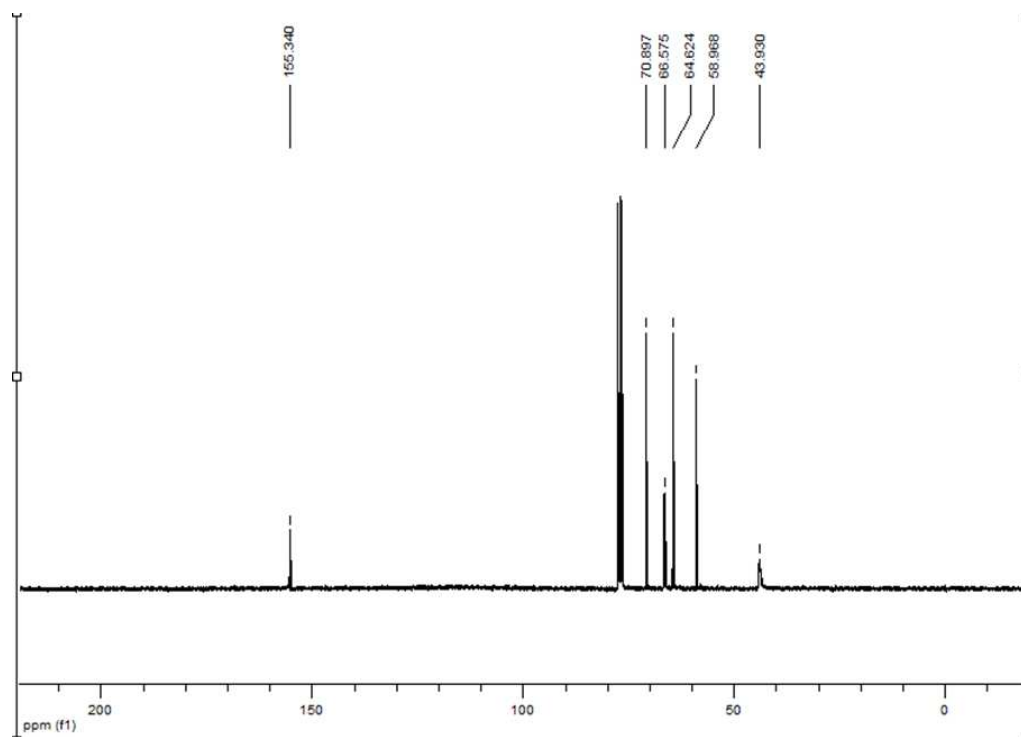

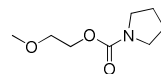

<sup>1</sup>H NMR 2-methoxyethyl pyrrolidine-1-carboxylate (CDCl<sub>3</sub>) **4m**

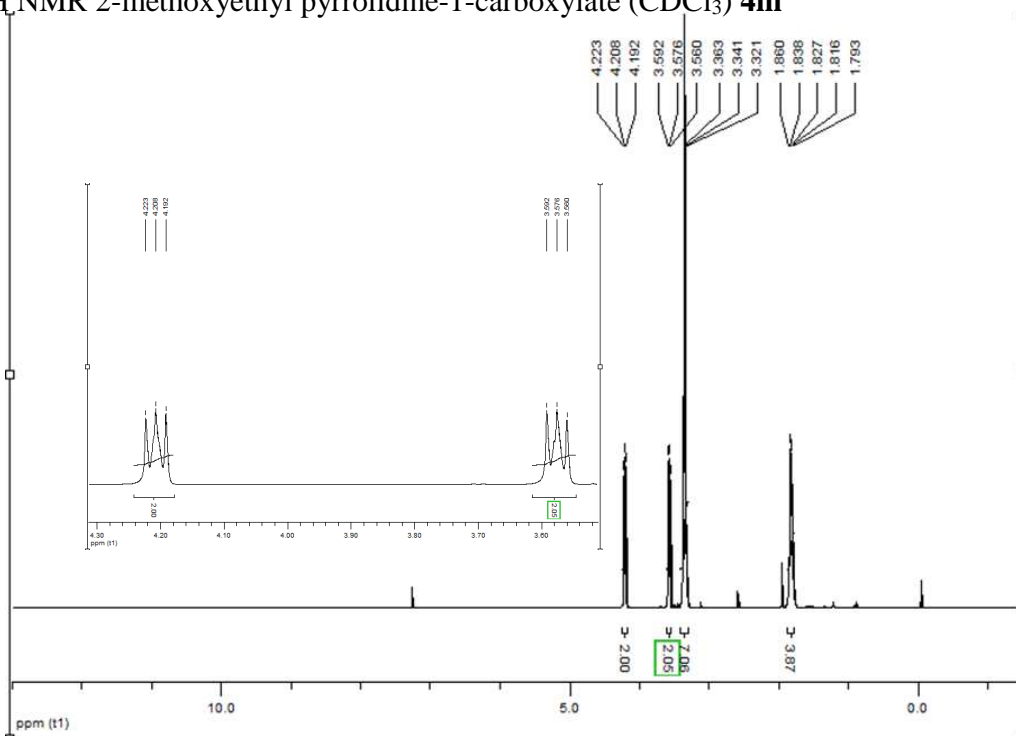

<sup>13</sup>C NMR 2-methoxyethyl pyrrolidine-1-carboxylate (CDCl<sub>3</sub>) **4m**

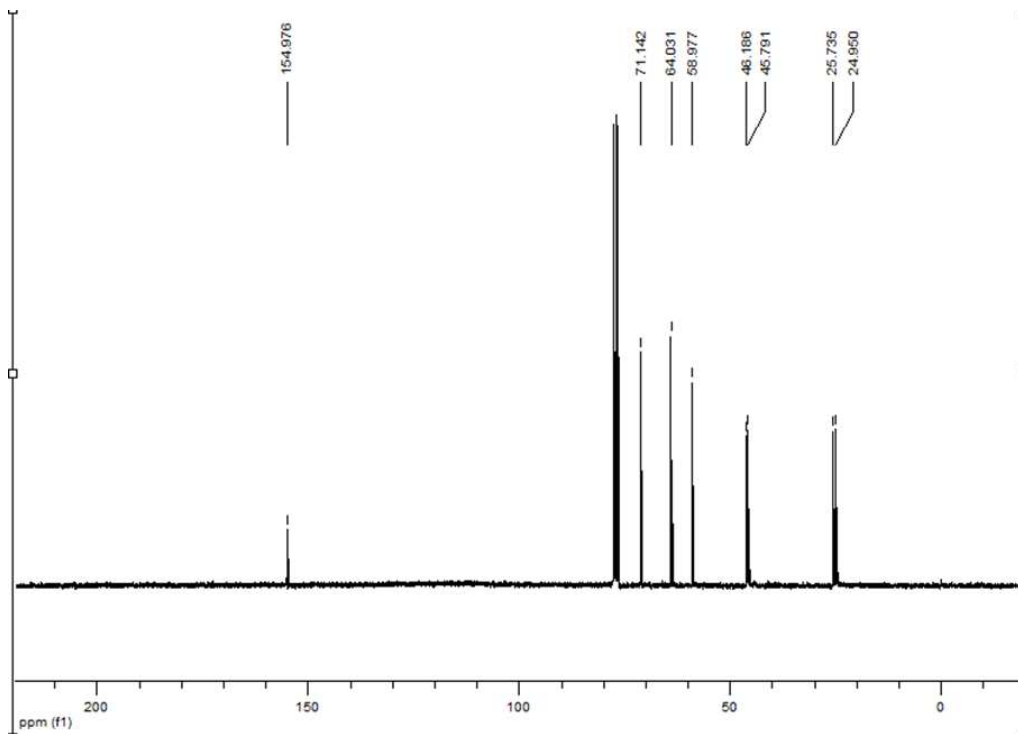

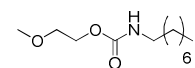

$^1\text{H}$  NMR 2-methoxyethyl octylcarbamate ( $\text{CDCl}_3$ ) **4n**

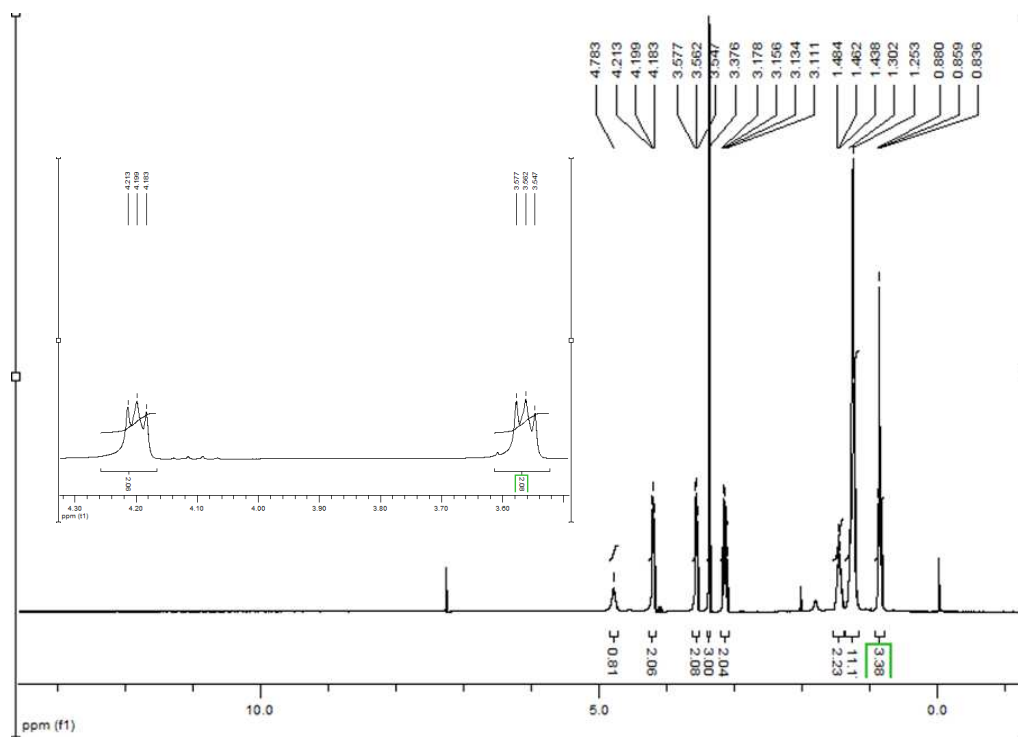

$^{13}\text{C}$  NMR 2-methoxyethyl octylcarbamate ( $\text{CDCl}_3$ ) **4n**

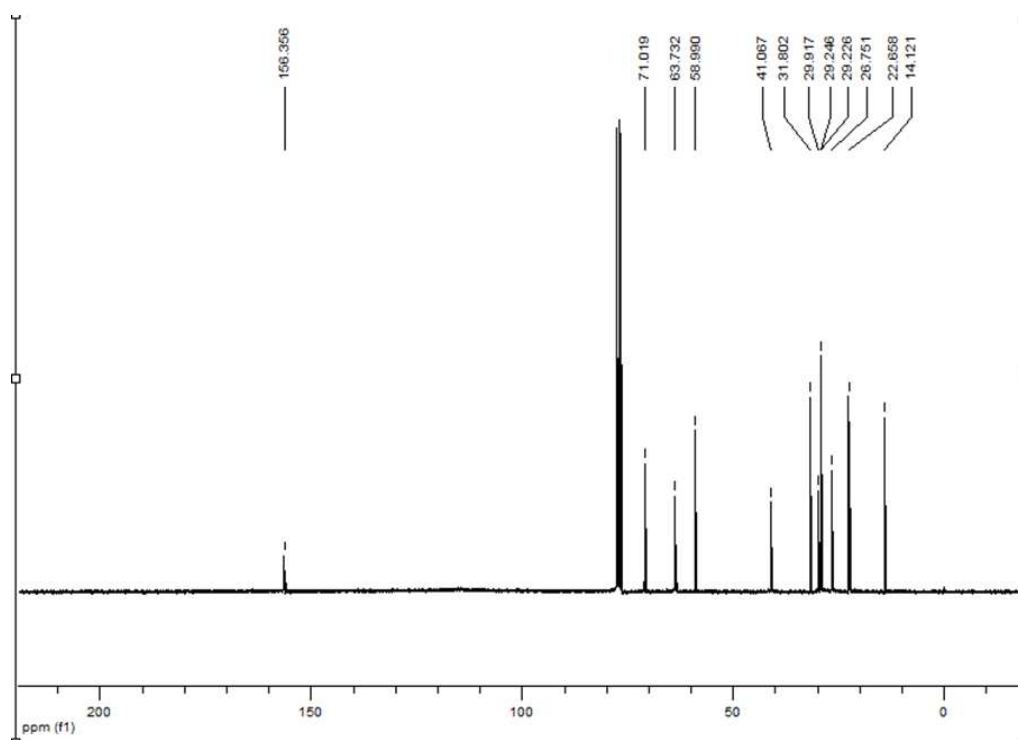

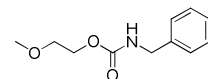

$^1\text{H}$  NMR 2-methoxyethyl benzylcarbamate ( $\text{CDCl}_3$ ) **4o**

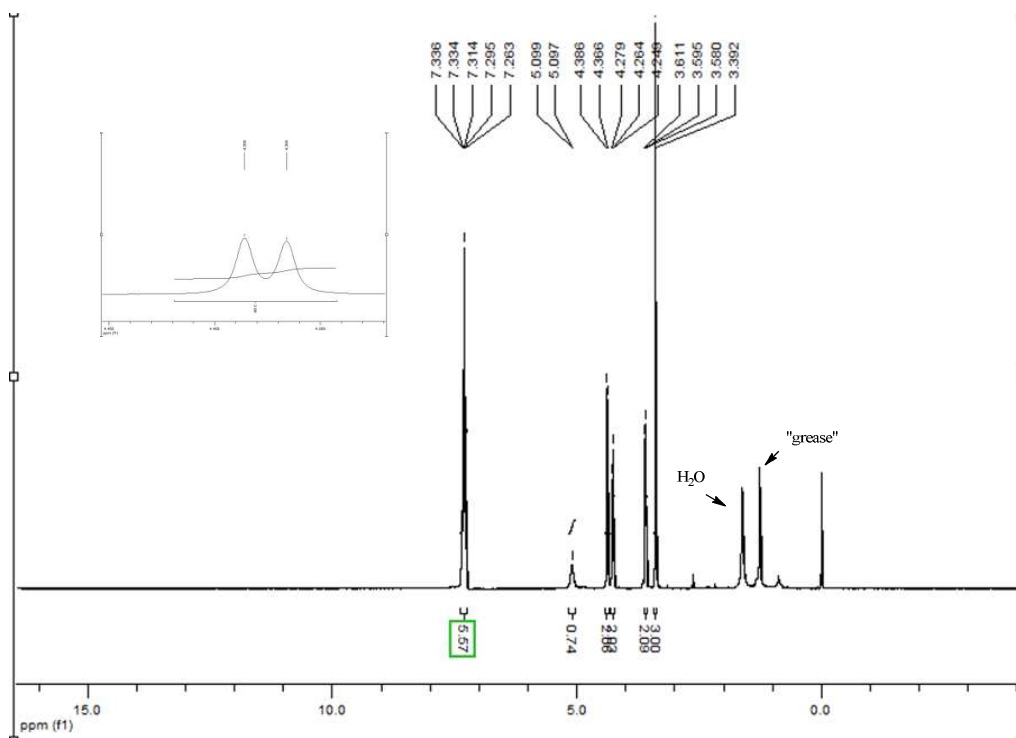

$^{13}\text{C}$  NMR 2-methoxyethyl benzylcarbamate ( $\text{CDCl}_3$ ) **4o**

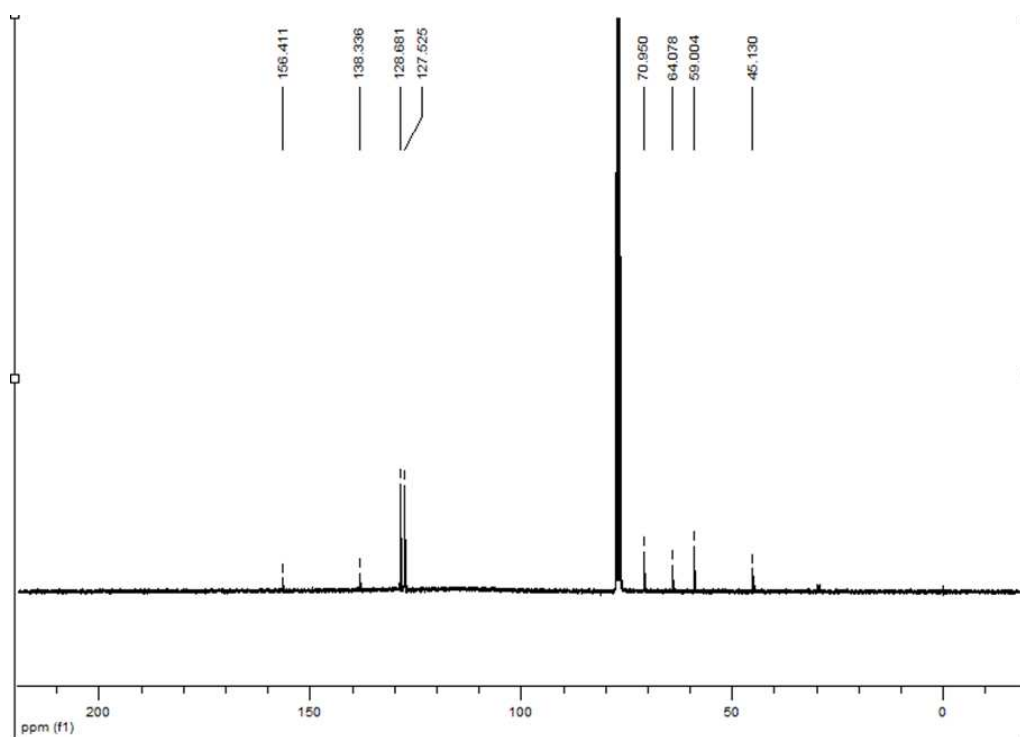



$^1\text{H}$  NMR cyclohexyl 4-oxopiperidine-1-carboxylate ( $\text{CDCl}_3$ ) **4p**

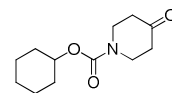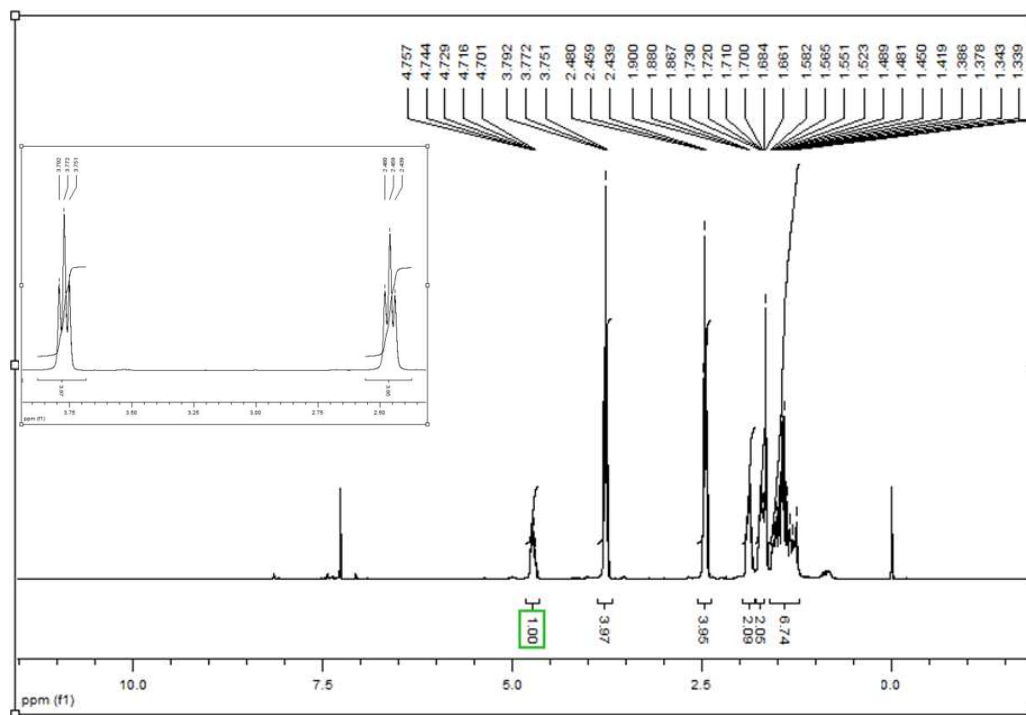

$^{13}\text{C}$  NMR cyclohexyl 4-oxopiperidine-1-carboxylate ( $\text{CDCl}_3$ ) **4p**

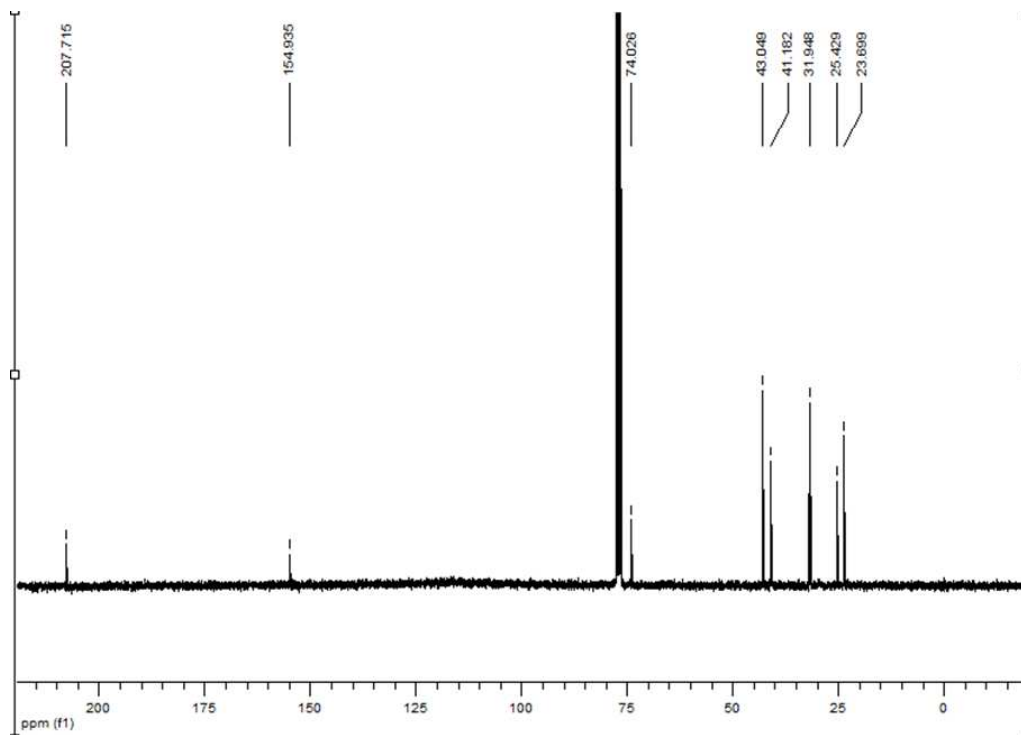

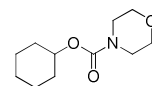

$^1\text{H}$  NMR cyclohexyl morpholine-4-carboxylate ( $\text{CDCl}_3$ ) **4q**

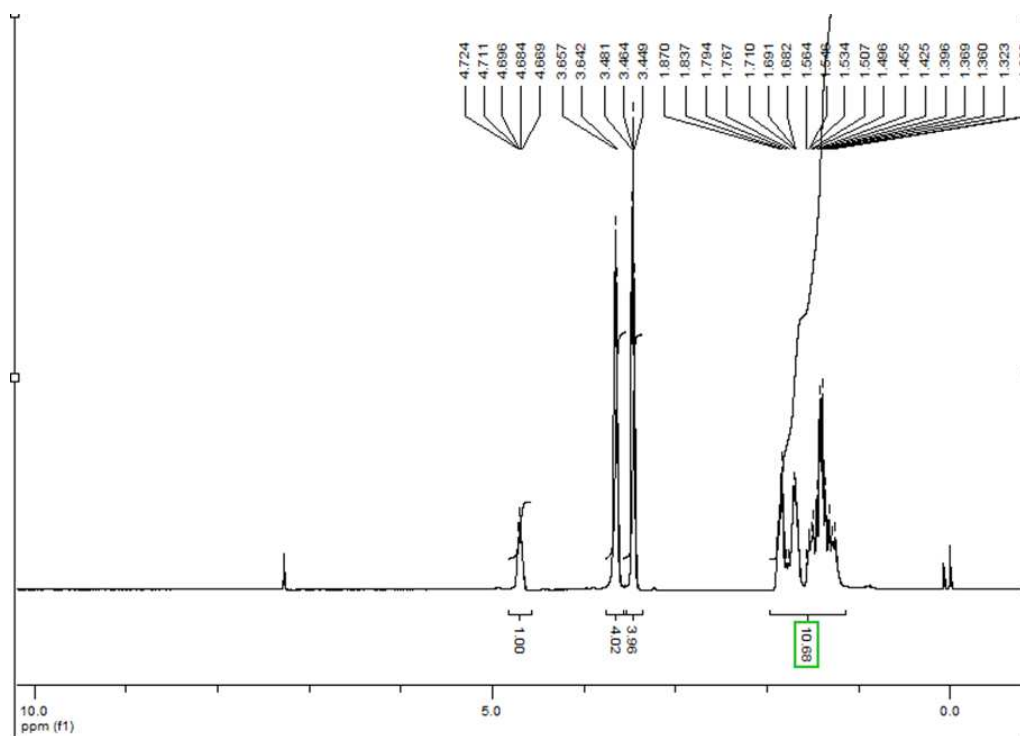

$^{13}\text{C}$  NMR cyclohexyl morpholine-4-carboxylate ( $\text{CDCl}_3$ ) **4q**

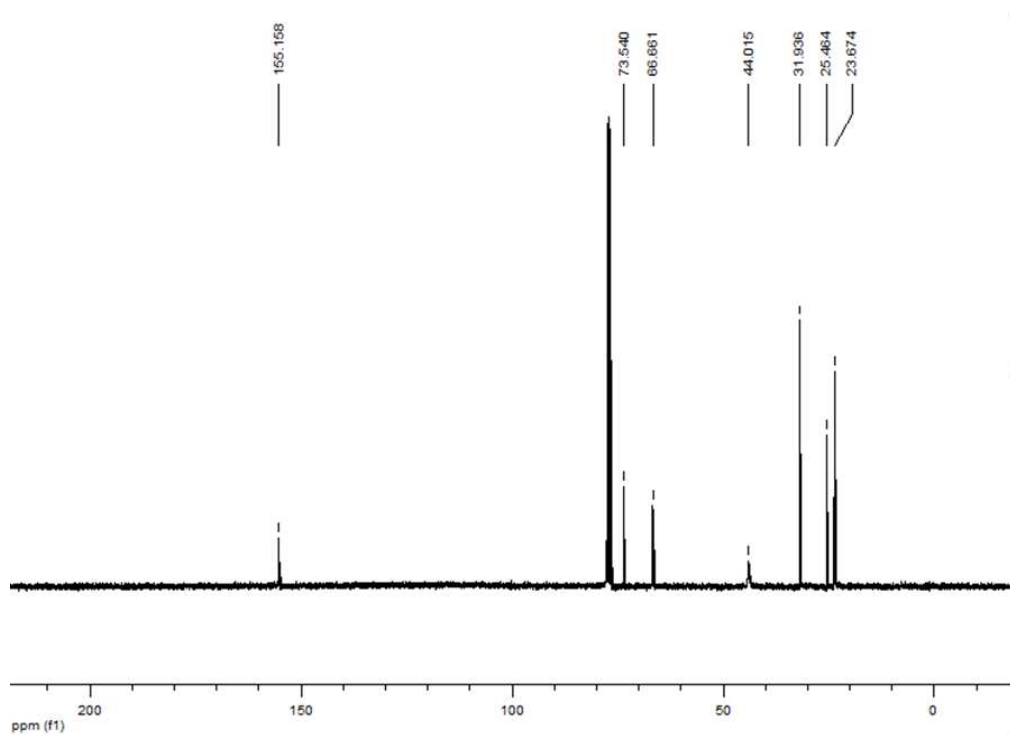

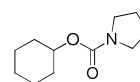

$^1\text{H}$  NMR cyclohexyl pyrrolidine-1-carboxylate ( $\text{CDCl}_3$ ) **4r**

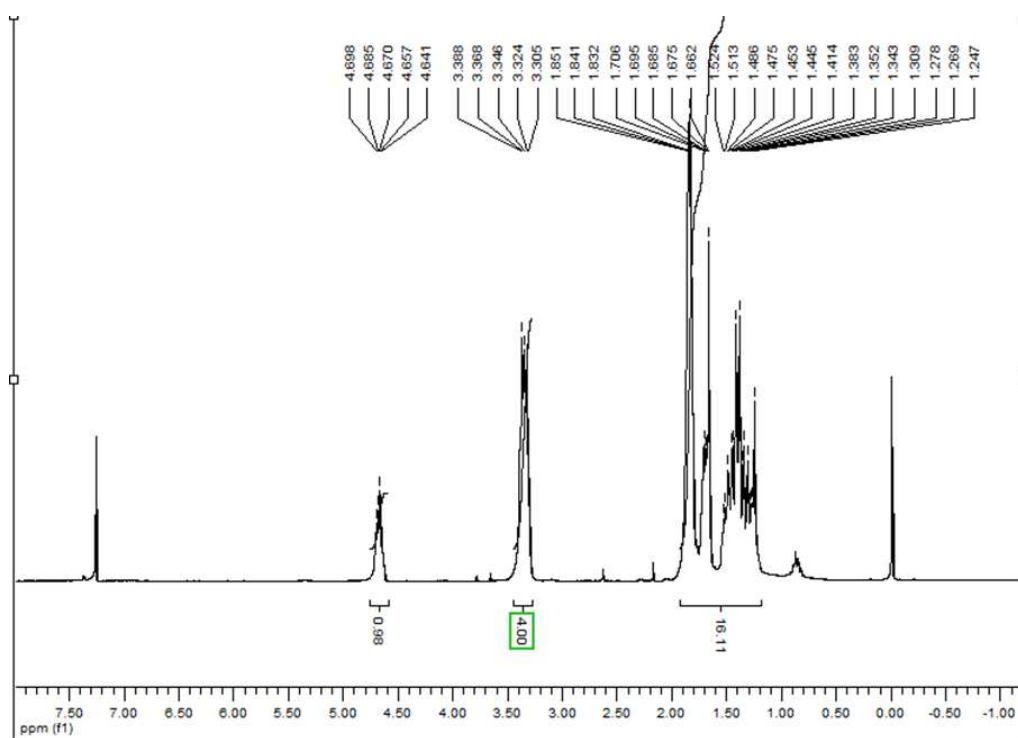

$^{13}\text{C}$  NMR cyclohexyl pyrrolidine-1-carboxylate ( $\text{CDCl}_3$ ) **4r**

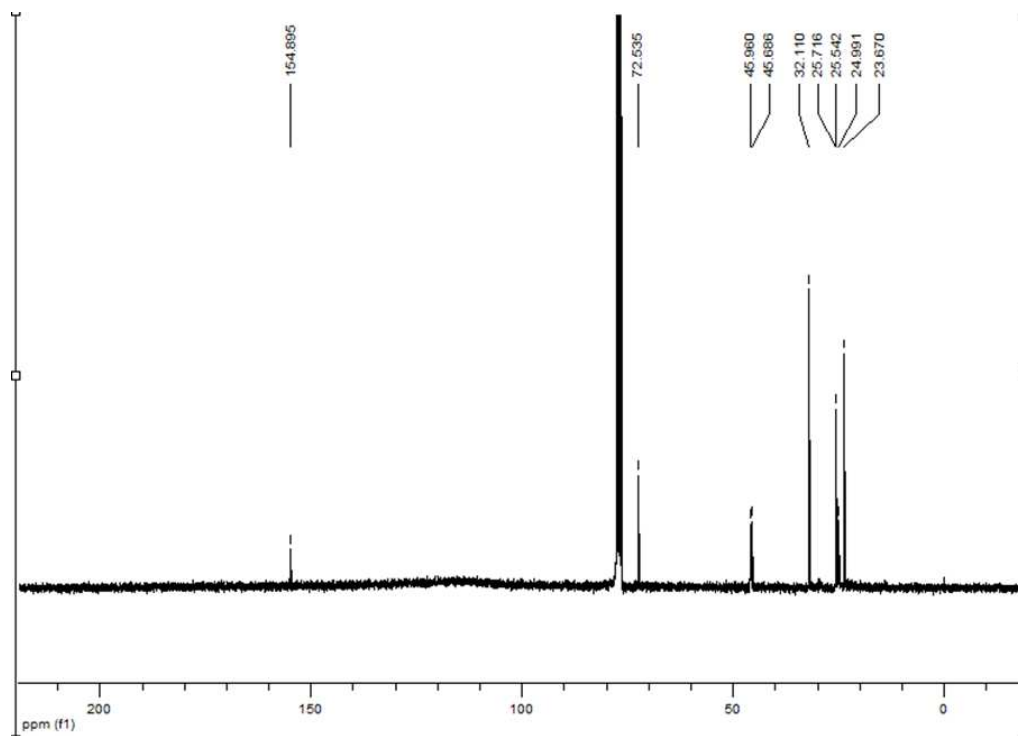

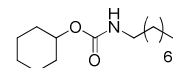

$^1\text{H}$  NMR cyclohexyl octylcarbamate ( $\text{CDCl}_3$ ) **4s**

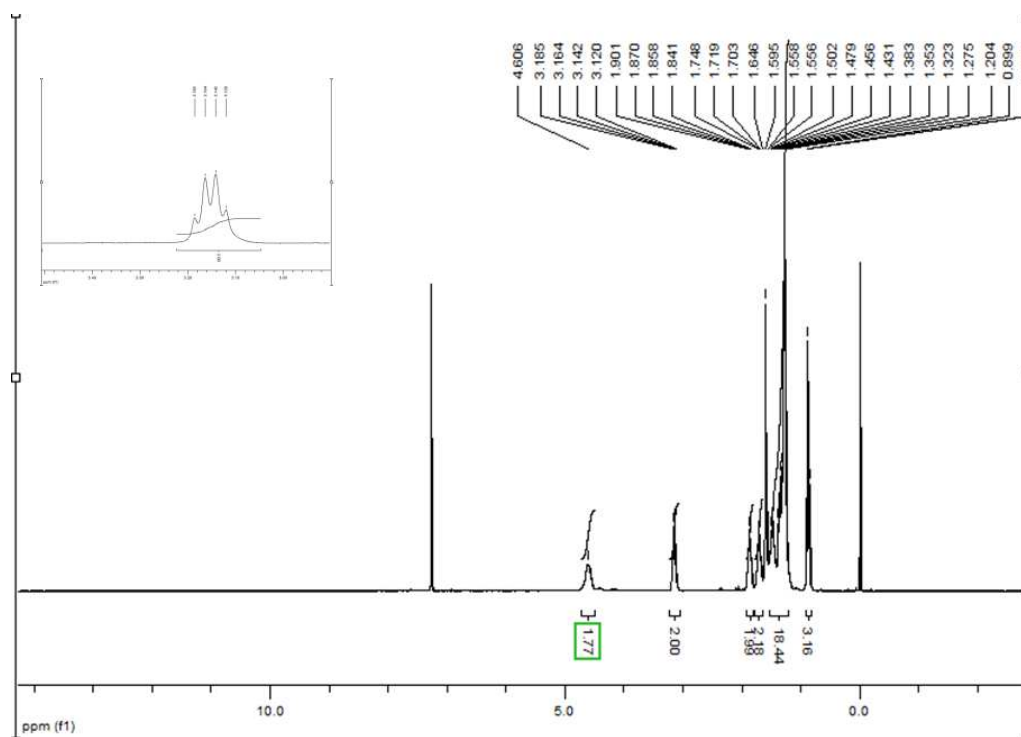

$^{13}\text{C}$  NMR cyclohexyl octylcarbamate ( $\text{CDCl}_3$ ) **4s**

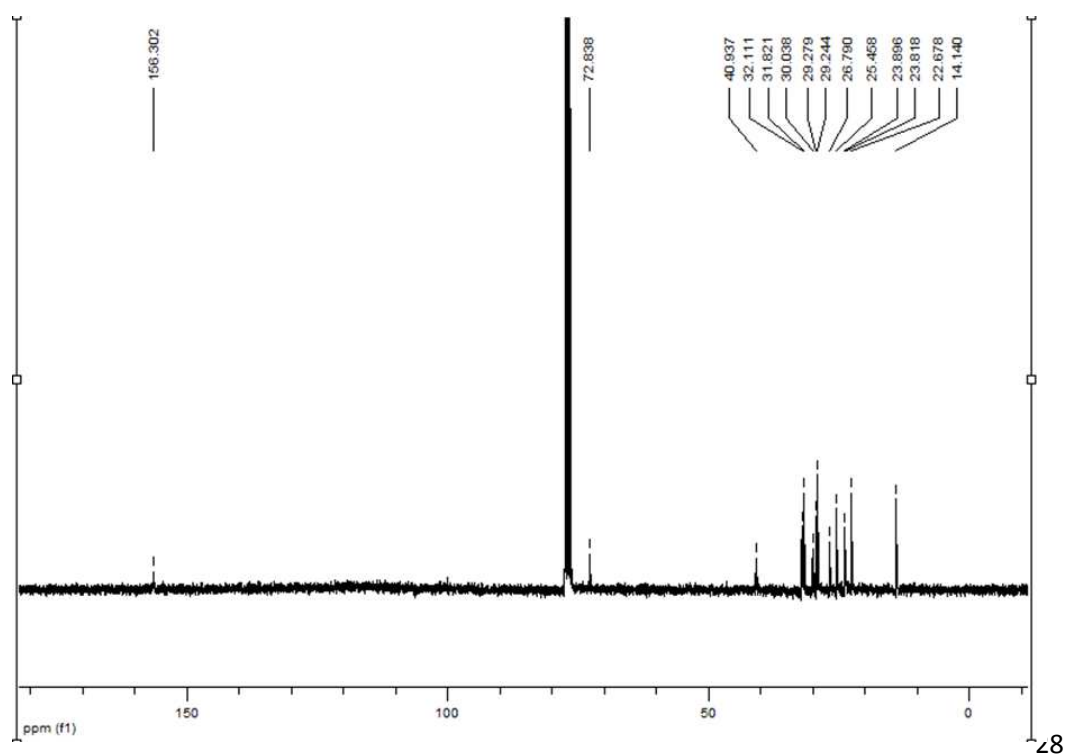

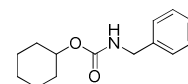

$^1\text{H}$  NMR cyclohexyl benzylcarbamate ( $\text{CDCl}_3$ ) **4t**

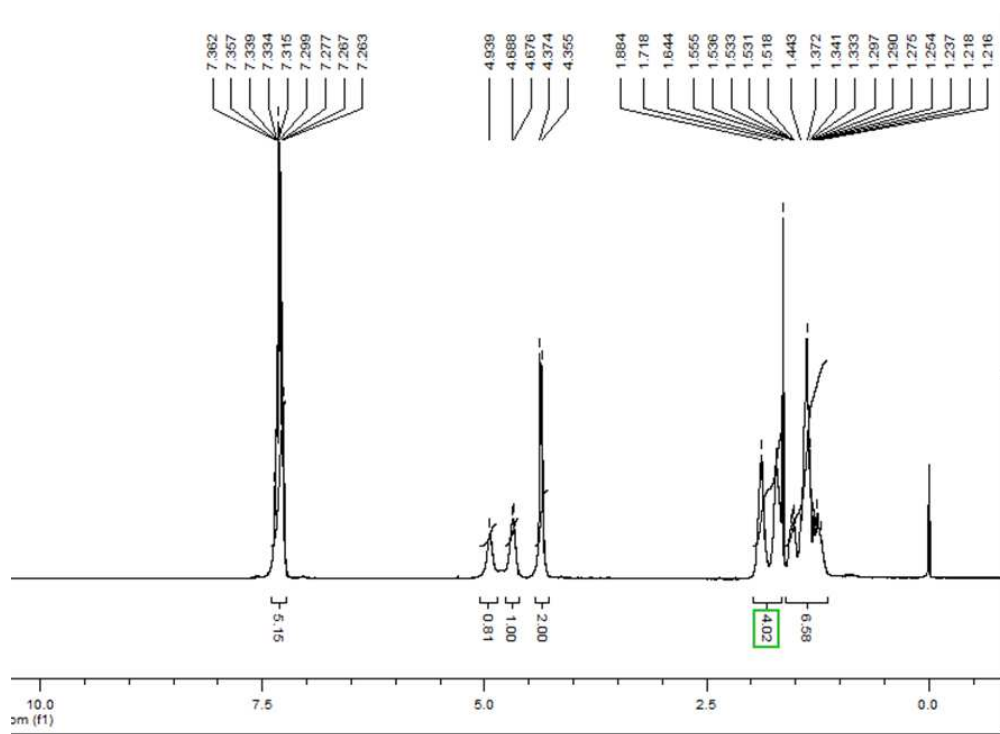

$^{13}\text{C}$  NMR Cyclohexyl benzylcarbamate ( $\text{CDCl}_3$ ) **4t**

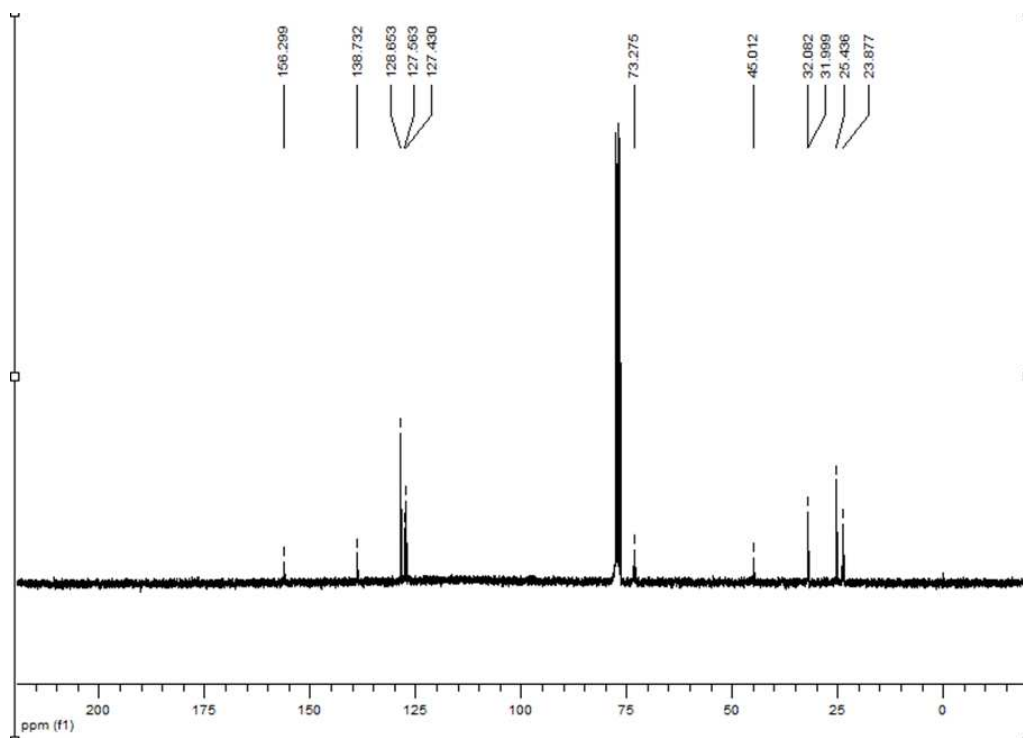

Supplement: c4ra00373j1.pdf [file c4ra00373j1.pdf]
